# Supplementary material for: Smart control of guest inclusion by α-cyclodextrin using its hydration history
Source: Royal Society of Chemistry journal article supplement (doi:10.1039/c9ra08710a), 2019-01-01
Supplement: c9ra08710a1.pdf [file c9ra08710a1.pdf]

## Smart Control of Guest Inclusion with $\alpha$ -Cyclodextrin Using its Hydration History

Askar K. Gatiatulin, Viktoria Yu. Osel'skaya, Marat A. Ziganshin, Valery V. Gorbachuk\*

*A. M. Butlerov Institute of Chemistry, Kazan Federal University, Kremlyovskaya 18, 420008 Kazan, Russia*

*Corresponding Author: Prof. Valery V. Gorbachuk A.M. Butlerov Institute of Chemistry, Kazan Federal University, Kremlevskaya 18, 420008 Kazan, Russia, Fax: +7 843 2927418. Tel: +7 843 2337309. E-mail: Valery.Gorbachuk@kpfu.ru.*

### Electronic Supplementary Material

|                                                                                                                                 |    |
|---------------------------------------------------------------------------------------------------------------------------------|----|
| TG/MS curves for clathrates prepared with saturation of aCD·5.9H <sub>2</sub> O hexahydrate.....                                | 2  |
| TG/MS curves for clathrates prepared with saturation of tetrahydrate <b>A</b> .....                                             | 5  |
| TG/MS curves for clathrates with saturation of tetrahydrate <b>B</b> .....                                                      | 8  |
| TG/MS curves for clathrates prepared with saturation of hexahydrate aCD·5.9H <sub>2</sub> O in the presence of a desiccant..... | 11 |
| TG/DSC/MS curves for the tetrahydrate <b>B</b> and ternary clathrates with EtCN.....                                            | 13 |
| X-Ray powder diffraction data.....                                                                                              | 14 |
| X-Ray powder diffractograms.....                                                                                                | 18 |
| Indexation of X-Ray powder diffractogram for anhydrous aCD .....                                                                | 22 |
| Sorption isotherm data.....                                                                                                     | 23 |
| Data on kinetics of dehydration for tetrahydrate <b>A</b> .....                                                                 | 24 |
| Data on kinetics of dehydration for tetrahydrate <b>B</b> .....                                                                 | 26 |
| Data on kinetics of water and EtCN release from ternary aCD clathrates.....                                                     | 28 |
| References.....                                                                                                                 | 35 |

TG/MS curves for clathrates prepared with saturation of aCD·5.9H<sub>2</sub>O hexahydrate

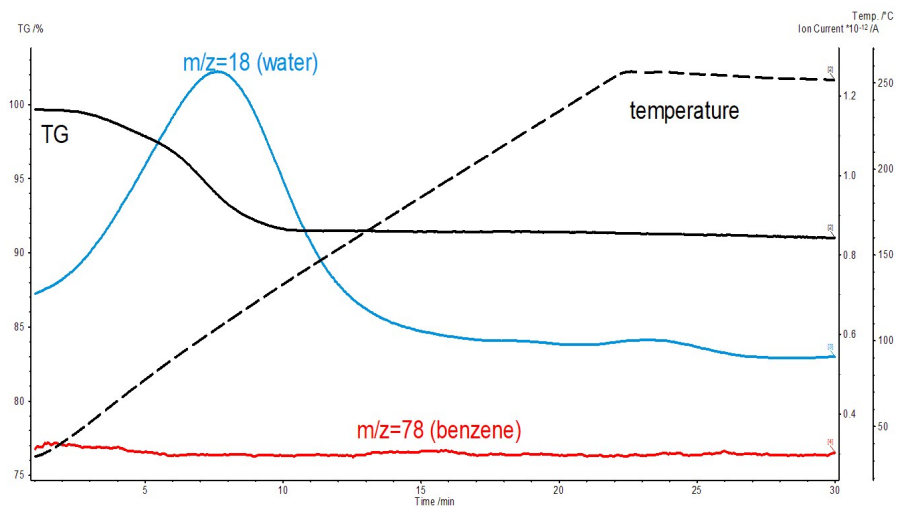

Figure S1. Product of saturation of aCD·5.9H<sub>2</sub>O hexahydrate with benzene vapor (no benzene inclusion).

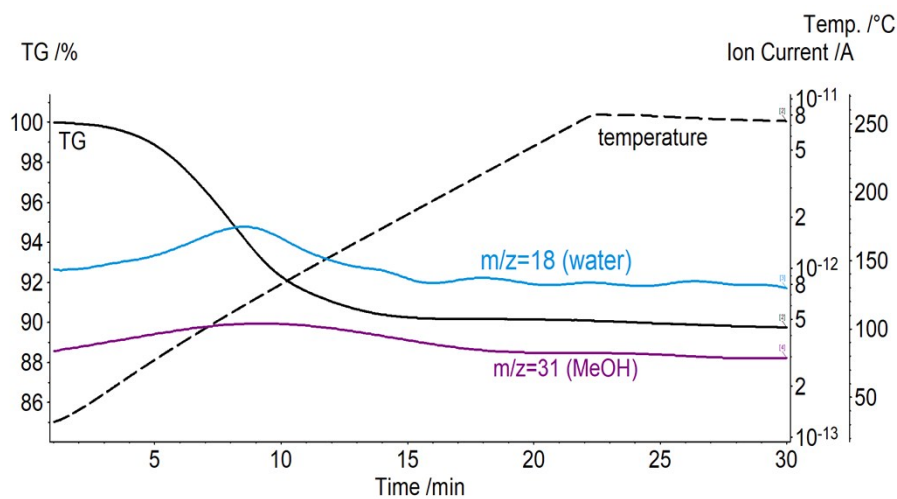

Figure S2. Product of saturation of aCD·5.9H<sub>2</sub>O hexahydrate with MeOH vapor: aCD·2.2CH<sub>3</sub>OH·2.3H<sub>2</sub>O.

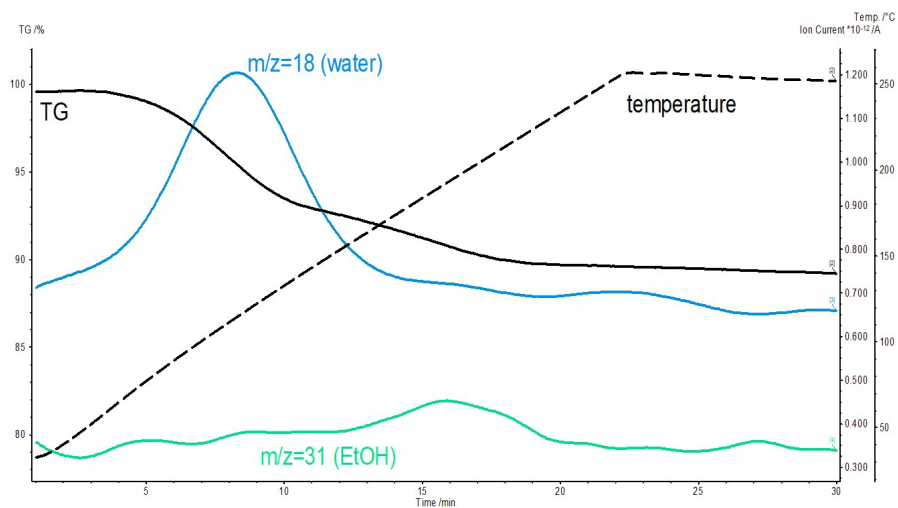

Figure S3. Product of saturation of aCD·5.9H<sub>2</sub>O hexahydrate with EtOH vapor: aCD·1.0EtOH·3.5H<sub>2</sub>O.

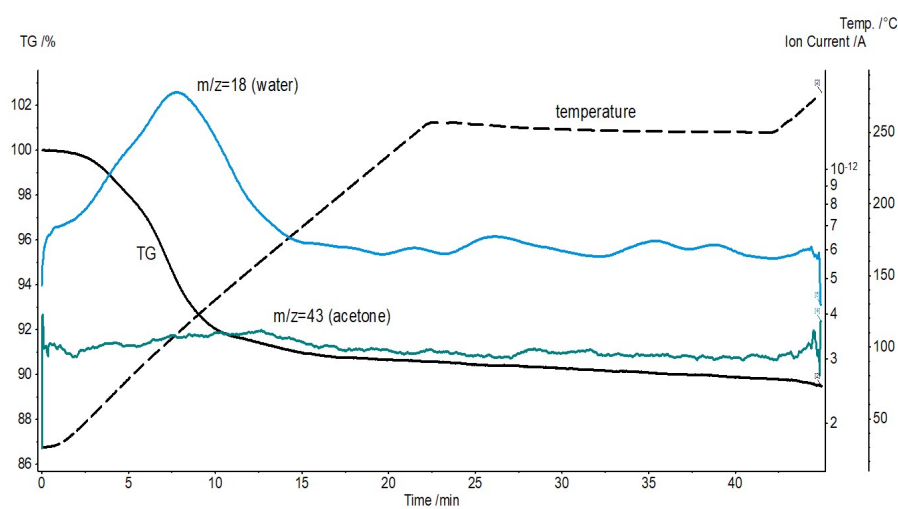

Figure S4. Product of saturation of aCD·5.9H<sub>2</sub>O hexahydrate with acetone vapor: aCD·0.2(CH<sub>3</sub>)<sub>2</sub>CO·3.5H<sub>2</sub>O

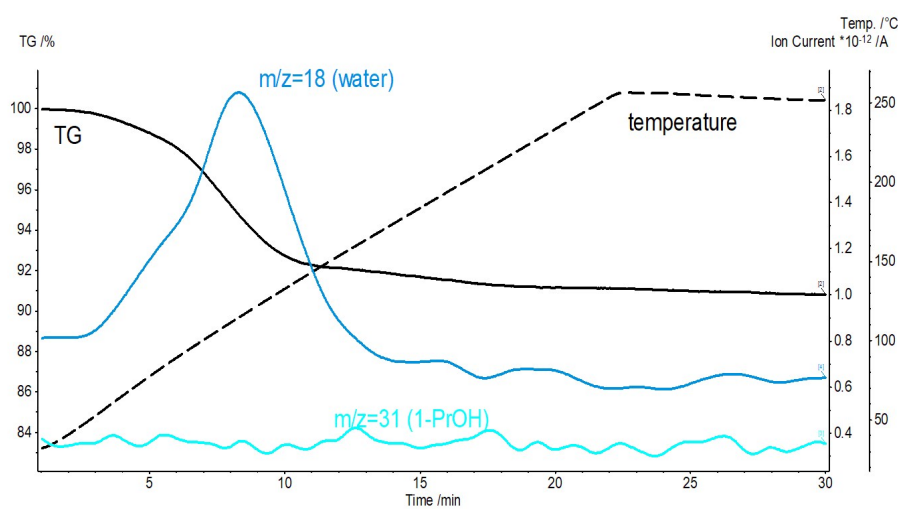

Figure S5. Product of saturation of aCD·5.9H<sub>2</sub>O hexahydrate with n-PrOH vapor: aCD·0.3n-PrOH·5H<sub>2</sub>O

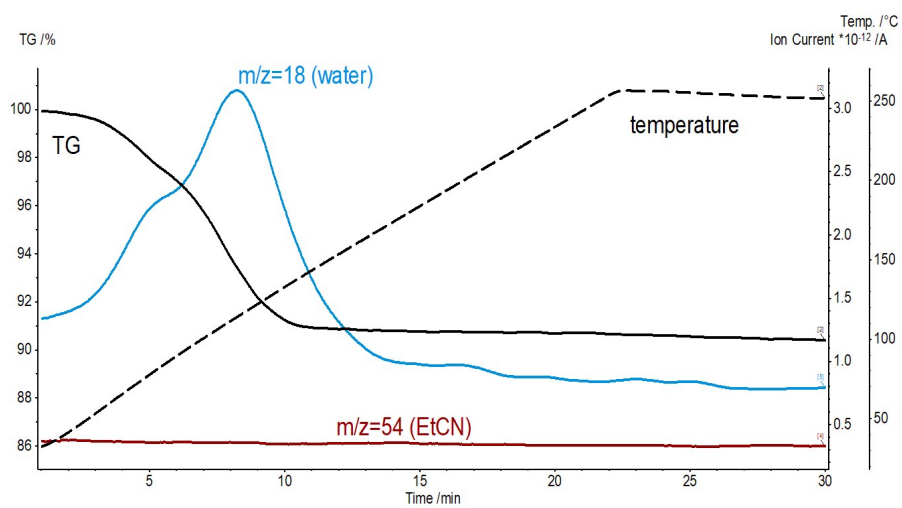

Figure S6. Product of saturation of aCD·5.9H<sub>2</sub>O hexahydrate with benzene EtCN vapor (no EtCN inclusion).

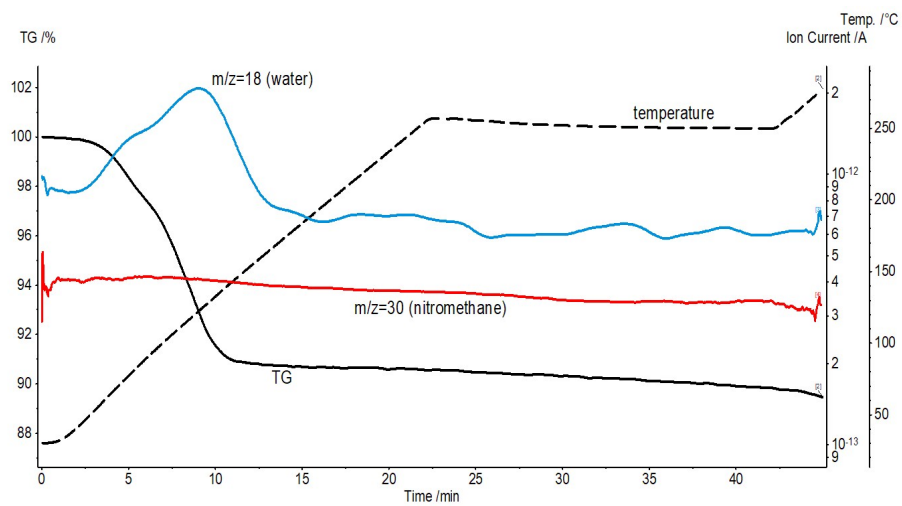

Figure S7. Product of saturation of aCD·5.9H<sub>2</sub>O hexahydrate with nitromethane vapor (no nitromethane inclusion).

### TG/MS curves for clathrates prepared with saturation of tetrahydrate A

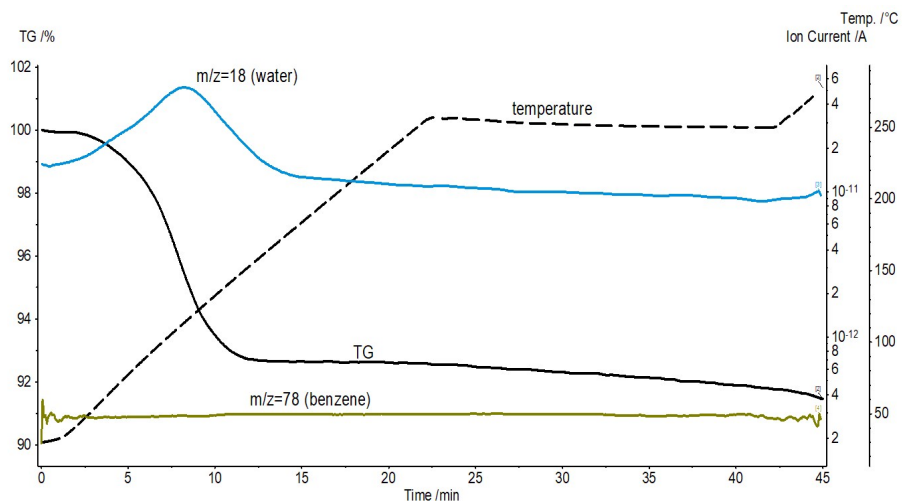

Figure S8. Product of saturation of aCD tetrahydrate A with benzene vapor (no benzene inclusion).

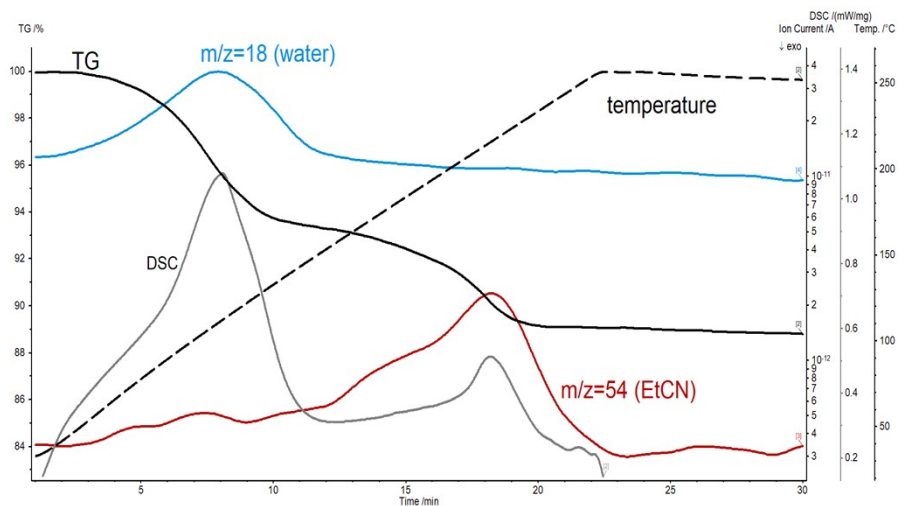

Figure S9. Product of saturation of aCD tetrahydrate A with EtCN vapor ( $\text{aCD} \cdot 0.9\text{EtCN} \cdot 3.8\text{H}_2\text{O}$ ).

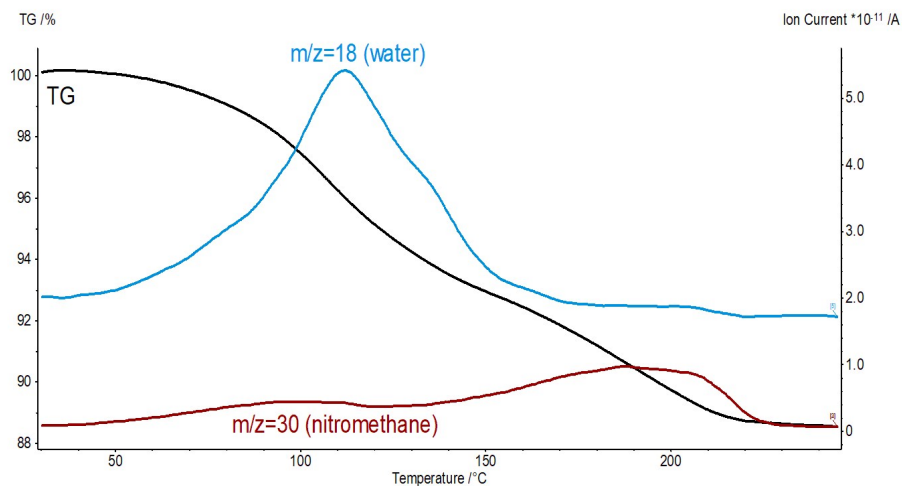

Figure S10. Product of saturation of aCD tetrahydrate A with nitromethane vapor ( $\text{aCD} \cdot 1.4\text{MeNO}_2 \cdot 2.0\text{H}_2\text{O}$ ).

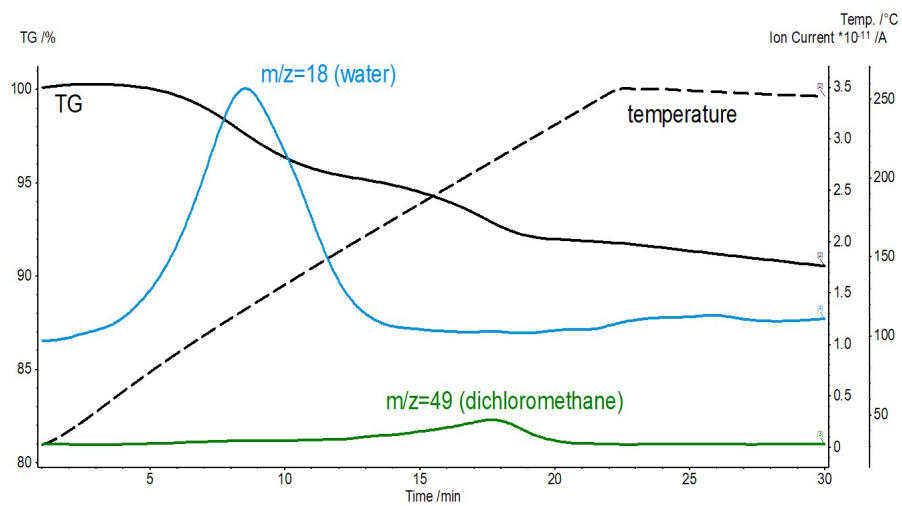

Figure S11. Product of saturation of aCD tetrahydrate A with dichloromethane vapor ( $aCD \cdot 0.4CH_2Cl_2 \cdot 3.0H_2O$ ).

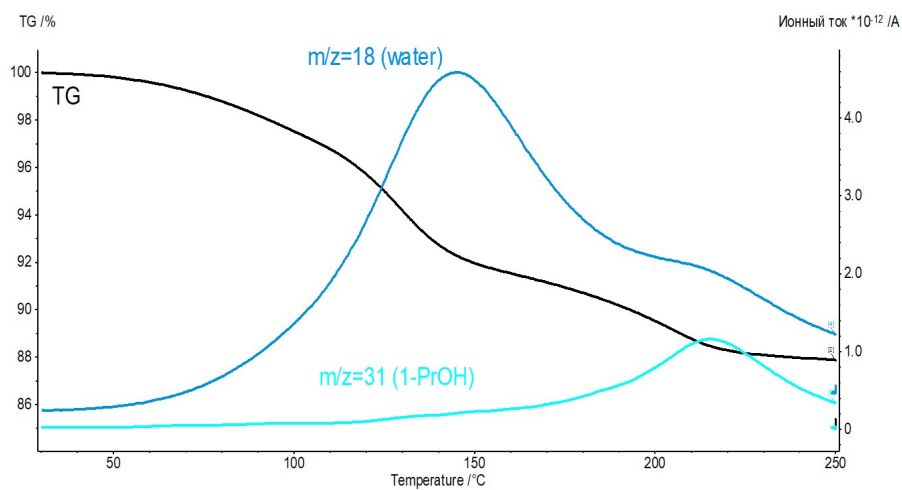

Figure S12. Product of saturation of aCD tetrahydrate A with n-PrOH vapor ( $aCD \cdot 0.9n\text{-PrOH} \cdot 4.3H_2O$ ).

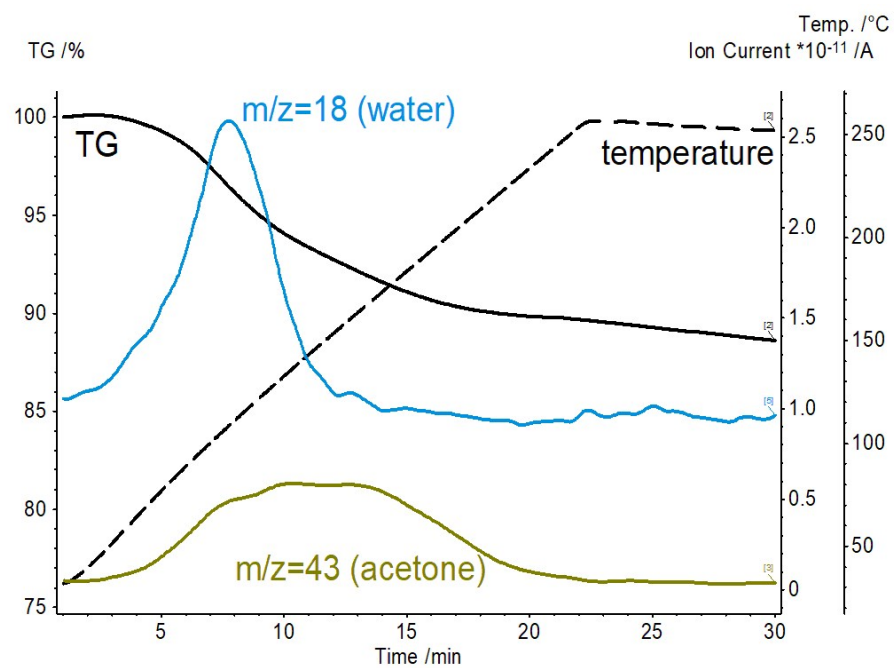

Figure S13. Product of saturation of aCD tetrahydrate A with acetone vapor ( $\text{aCD} \cdot 1.2(\text{CH}_3)_2\text{CO} \cdot 2.3\text{H}_2\text{O}$ ).

### TG/MS curves for clathrates with saturation of tetrahydrate B

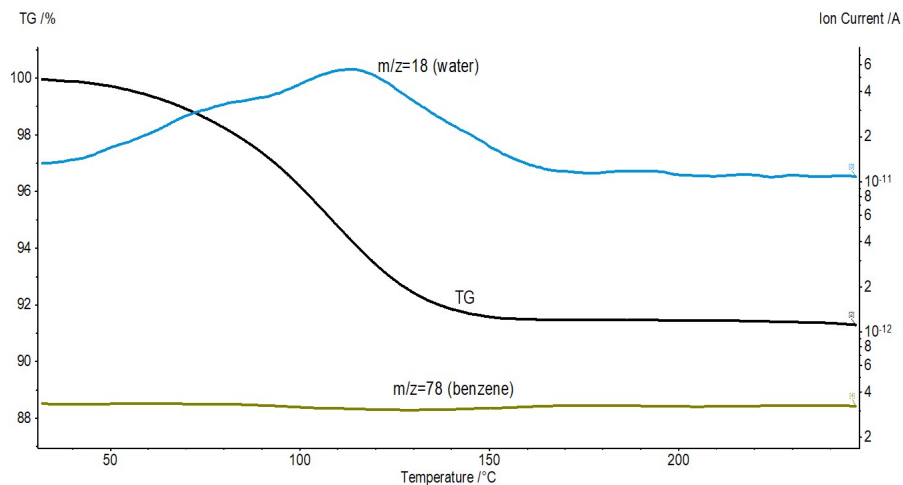

Figure S14. Product of saturation of aCD tetrahydrate **B** with benzene vapor (no benzene inclusion).

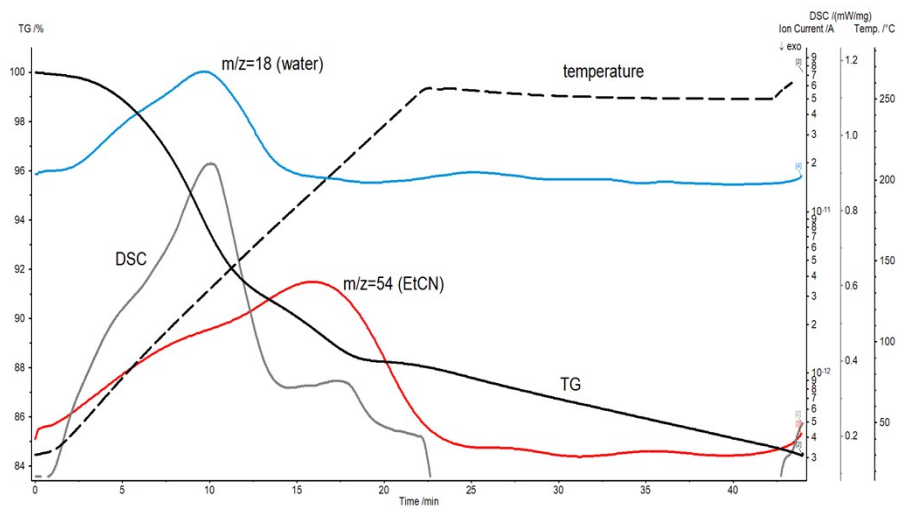

Figure S15. Product of saturation of aCD tetrahydrate **B** with EtCN vapor ( $\text{aCD} \cdot 1.0\text{EtCN} \cdot 4.1\text{H}_2\text{O}$ ).

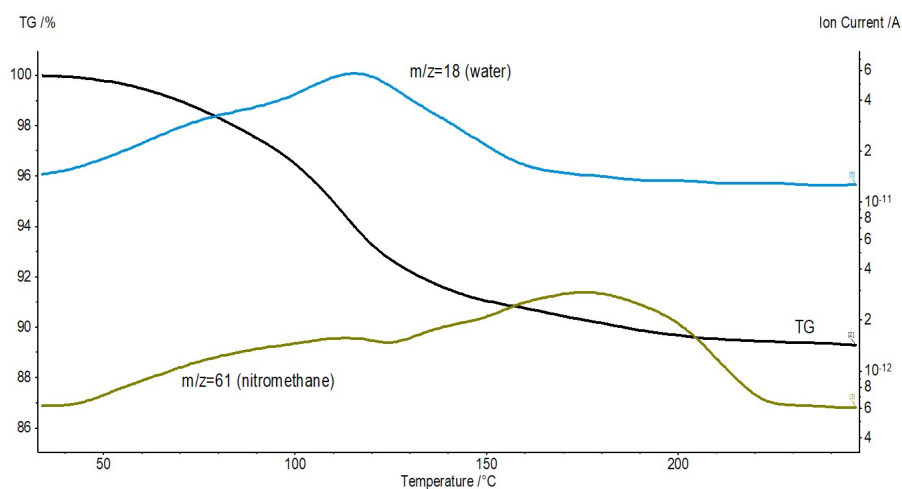

Figure S16. Product of saturation of aCD tetrahydrate **B** with nitromethane vapor ( $\text{aCD} \cdot 0.6\text{MeNO}_2 \cdot 4.5\text{H}_2\text{O}$ ).



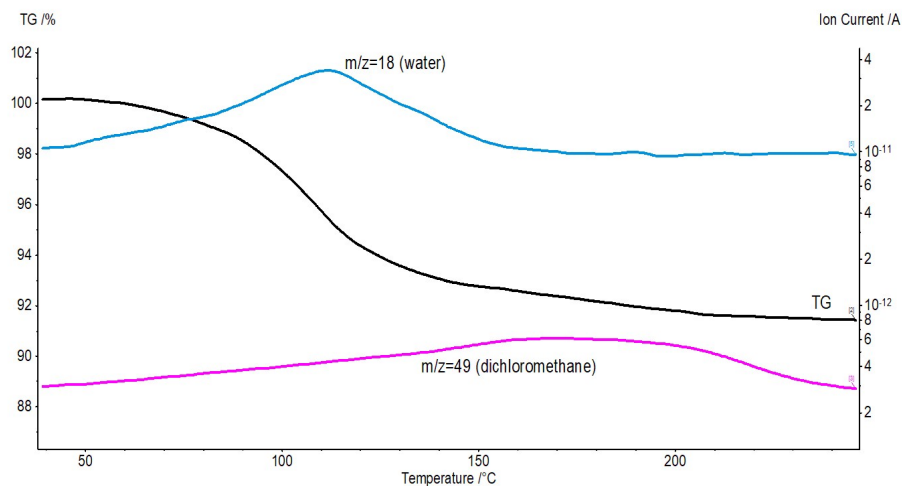

Figure S17. Product of saturation of aCD tetrahydrate **B** with dichloromethane vapor ( $\text{aCD} \cdot 0.3\text{CH}_2\text{Cl}_2 \cdot 4.0\text{H}_2\text{O}$ ).

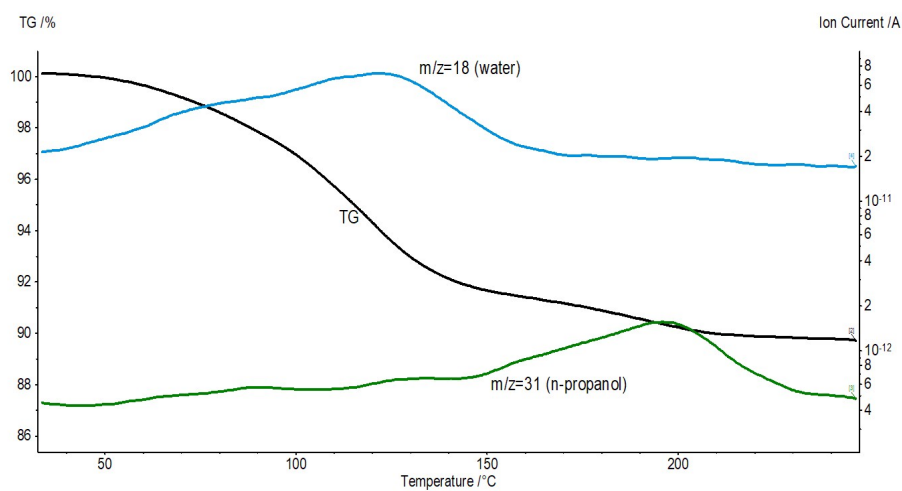

Figure S18. Product of saturation of aCD tetrahydrate **B** with *n*-propanol vapor ( $\text{aCD} \cdot 0.5n\text{-PrOH} \cdot 4.7\text{H}_2\text{O}$ ).

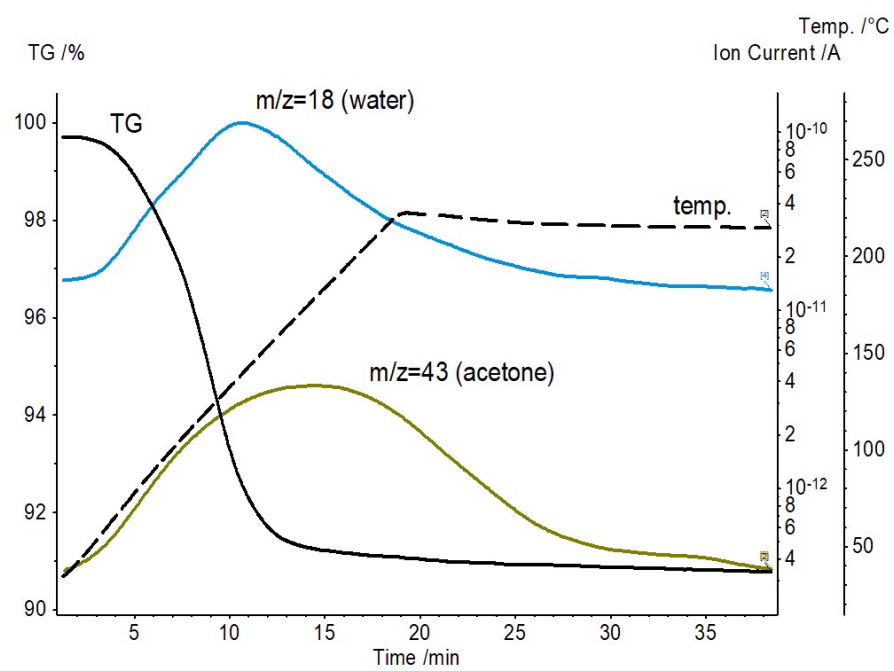

Figure S19. Product of saturation of aCD tetrahydrate **B** with acetone vapor ( $\text{aCD} \cdot 0.3(\text{CH}_3)_2\text{CO} \cdot 4.0\text{H}_2\text{O}$ ).

TG/MS curves for clathrates prepared with saturation of hexahydrate aCD·5.9H<sub>2</sub>O in the presence of a desiccant

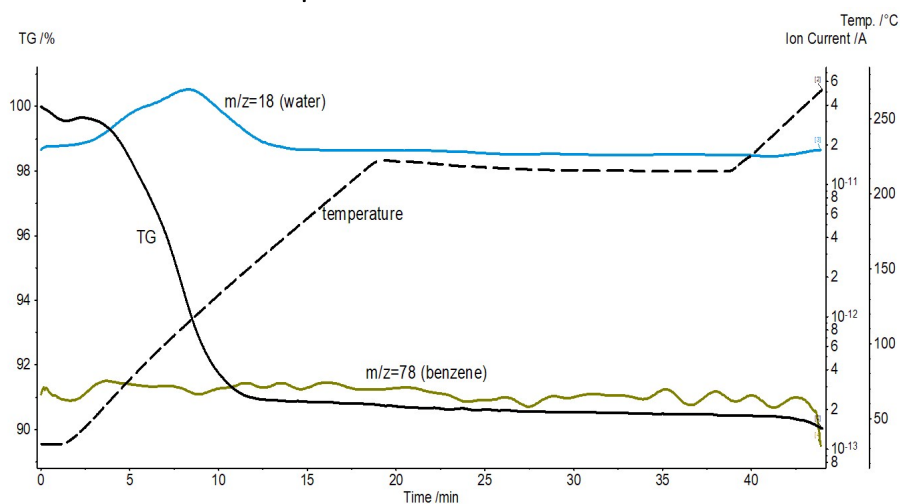

Figure S20. Product of saturation of aCD·5.9H<sub>2</sub>O hexahydrate with benzene vapor in the presence of a desiccant (no benzene inclusion).

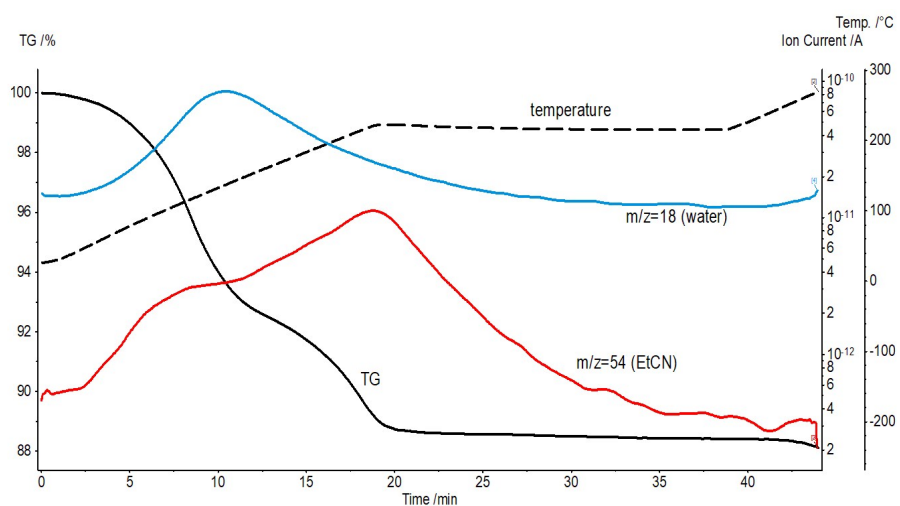

Figure S21. Product of saturation of aCD·5.9H<sub>2</sub>O hexahydrate with EtCN vapor in the presence of a desiccant (aCD·1.1EtCN·3.6H<sub>2</sub>O).

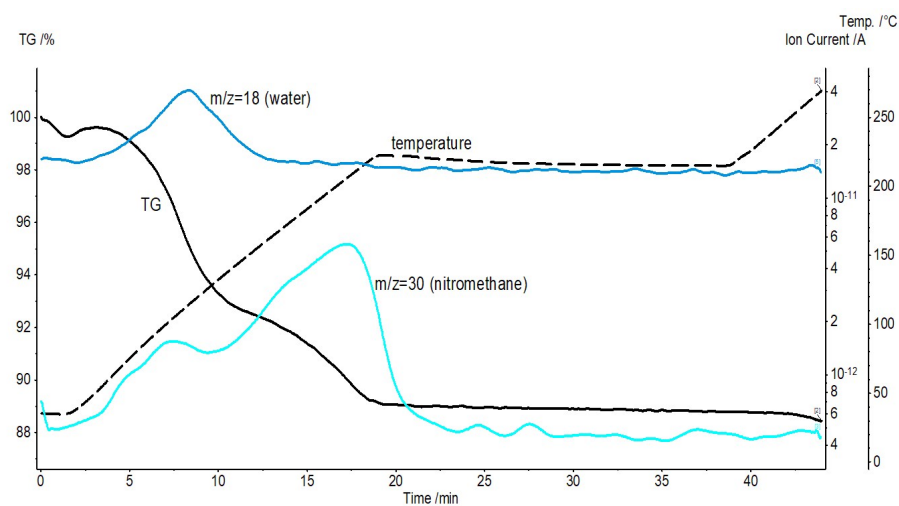

Figure S22. Product of saturation of aCD·5.9H<sub>2</sub>O hexahydrate with nitromethane vapor in the presence of a desiccant (aCD·1.0MeNO<sub>2</sub>·3.0H<sub>2</sub>O).

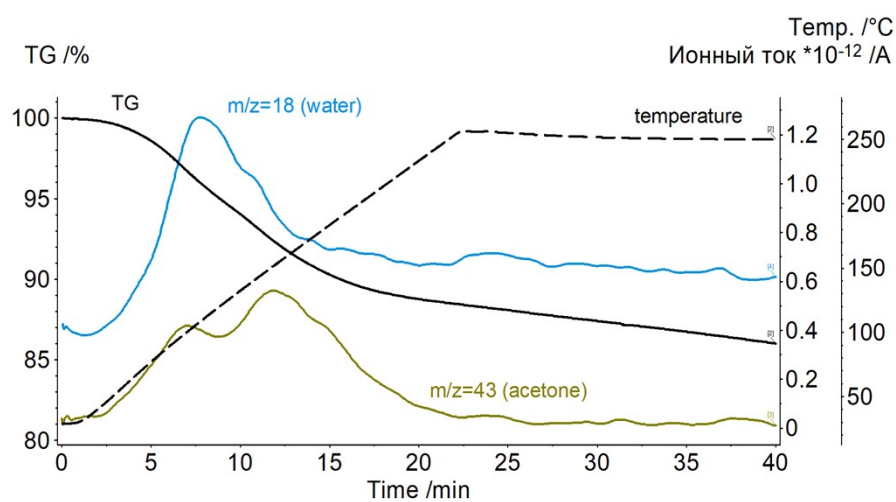

Figure S23. Product of saturation of aCD·5.9H<sub>2</sub>O hexahydrate with acetone vapor in the presence of a desiccant (aCD·1.3(CH<sub>3</sub>)<sub>2</sub>CO·2.7H<sub>2</sub>O).

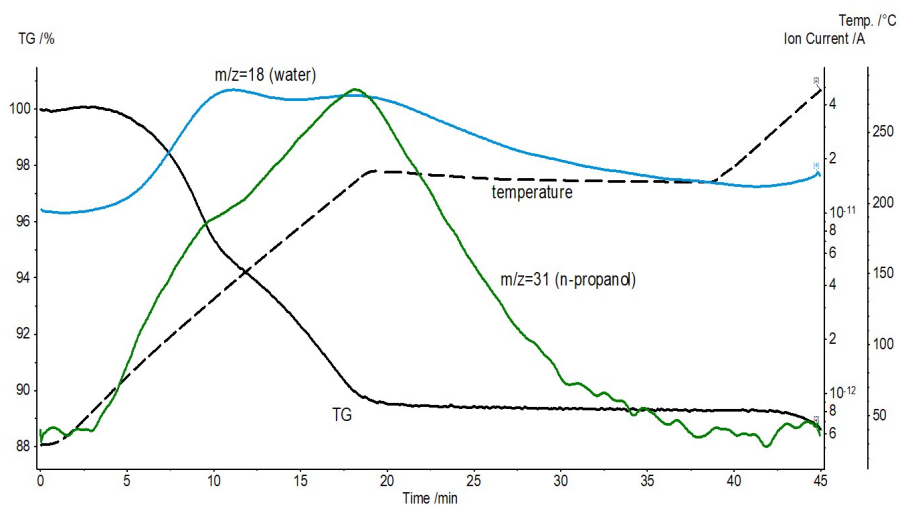

Figure S24. Product of saturation of aCD·5.9H<sub>2</sub>O hexahydrate with n-propanol vapor in the presence of a desiccant (aCD·1.1*n*-PrOH·3.0H<sub>2</sub>O).

TG/DSC/MS curves for the tetrahydrate B and ternary clathrates with EtCN

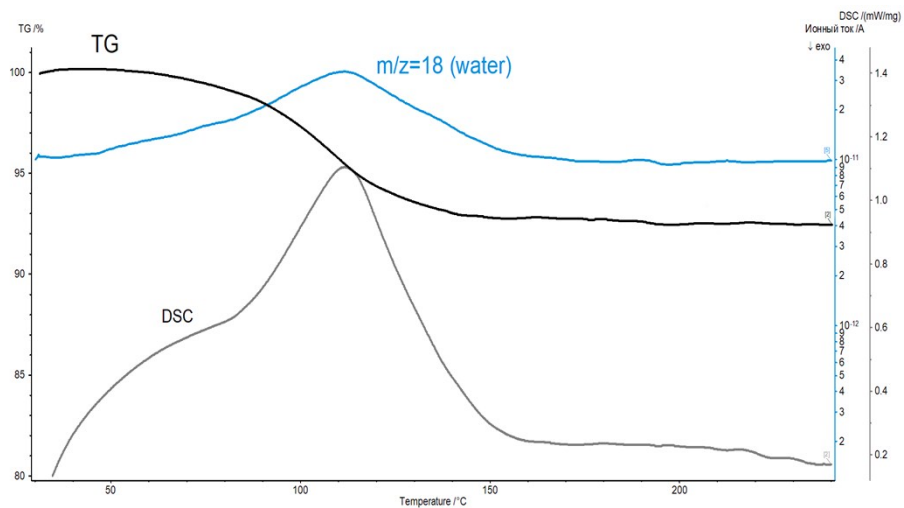

Figure S25. Tetrahydrate **B**.

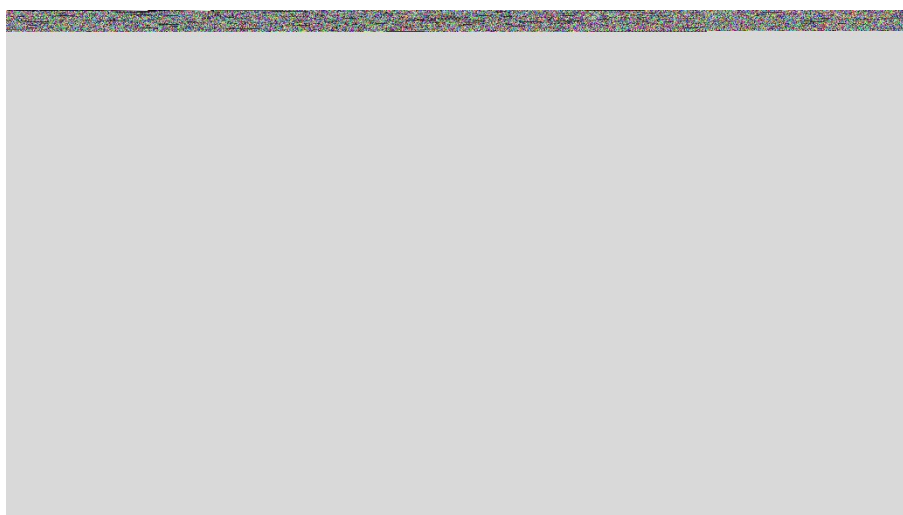

Figure S26. Product of saturation of aCD tetrahydrate **A** with EtCN vapor ( $\text{aCD} \cdot 0.9\text{EtCN} \cdot 3.8\text{H}_2\text{O}$ ).

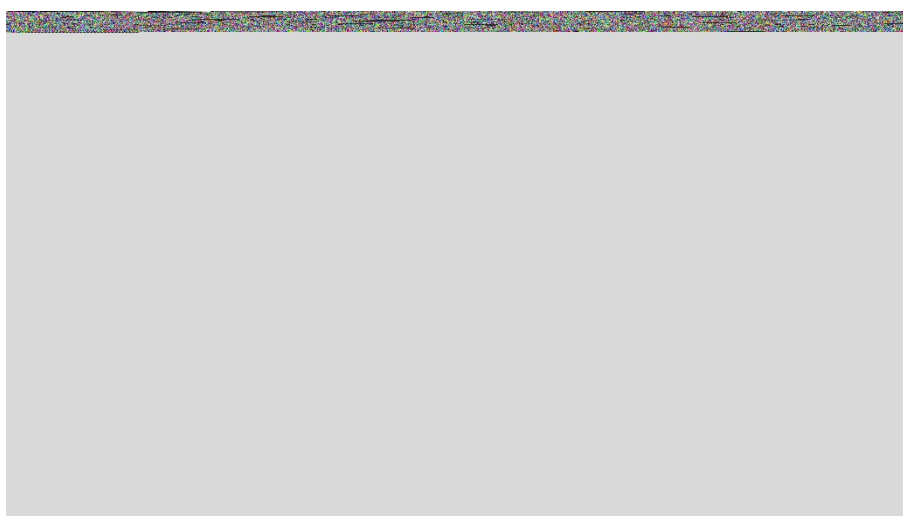

Figure S27. Product of saturation of aCD tetrahydrate **B** with EtCN vapor ( $\text{aCD} \cdot 1.0\text{EtCN} \cdot 4.1\text{H}_2\text{O}$ ).

## X-Ray powder diffraction data

Table S1. PXRD data table for tetrahydrate A (Form IIIa).

| peak No. | 2 $\theta$ (°) | d(Å)    | Height (counts) | FWHM(°) | Relative intensity (%) | Asym. factor |
|----------|----------------|---------|-----------------|---------|------------------------|--------------|
| 1        | 4.919          | 17.5354 | 1726.9          | 0.2103  | 16.54                  | 2.5985       |
| 2        | 6.537          | 13.2886 | 146.9           | 0.2544  | 1.47                   | 0.9218       |
| 3        | 9.534          | 9.1860  | 3221.9          | 0.2963  | 35.80                  | 1.1518       |
| 4        | 9.816          | 8.9277  | 790.8           | 0.1656  | 4.91                   | 0.5654       |
| 5        | 12.179         | 7.2321  | 4230.6          | 0.4557  | 82.51                  | 4.8649       |
| 6        | 12.488         | 7.0576  | 479.6           | 0.4001  | 10.70                  | 0.4626       |
| 7        | 13.322         | 6.6267  | 4204.5          | 0.4817  | 100.00                 | 0.589        |
| 8        | 13.765         | 6.4196  | 2233.8          | 0.2206  | 20.21                  | 4.3998       |
| 9        | 14.798         | 5.9839  | 796.5           | 0.2893  | 8.64                   | 1.1502       |
| 10       | 15.640         | 5.6716  | 1003.6          | 0.3215  | 12.10                  | 1.1605       |
| 11       | 16.057         | 5.5292  | 532.2           | 0.2775  | 5.54                   | 0.7593       |
| 12       | 16.574         | 5.3627  | 105.1           | 0.2553  | 1.01                   | 2.793        |
| 13       | 18.271         | 4.8827  | 1348.0          | 0.6622  | 56.05                  | 0.4539       |
| 14       | 19.742         | 4.5342  | 1446.6          | 0.3135  | 21.48                  | 2.7261       |
| 15       | 20.130         | 4.4508  | 521.4           | 0.3944  | 13.45                  | 0.3169       |
| 16       | 20.651         | 4.3440  | 250.9           | 0.2272  | 3.36                   | 0.7104       |
| 17       | 21.153         | 4.2461  | 493.4           | 0.5548  | 16.27                  | 0.6762       |
| 18       | 21.919         | 4.1054  | 2705.7          | 0.3901  | 56.82                  | 1.2509       |
| 19       | 22.903         | 3.9390  | 486.8           | 0.6161  | 19.72                  | 0.3015       |
| 20       | 24.031         | 3.7653  | 97.3            | 0.0865  | 0.45                   | 1.325        |
| 21       | 24.786         | 3.6581  | 195.6           | 0.518   | 5.80                   | 0.8652       |
| 22       | 25.547         | 3.5568  | 561.7           | 0.323   | 7.98                   | 4.6633       |
| 23       | 26.486         | 3.4399  | 557.0           | 0.2881  | 6.95                   | 1.1155       |
| 24       | 26.994         | 3.3801  | 589.4           | 0.5197  | 13.58                  | 0.8013       |
| 25       | 28.056         | 3.2626  | 257.4           | 0.2921  | 3.41                   | 0.5635       |
| 26       | 29.058         | 3.1600  | 366.0           | 0.6388  | 9.78                   | 1.842        |
| 27       | 30.492         | 3.0253  | 325.3           | 0.442   | 5.96                   | 2.1048       |
| 28       | 31.212         | 2.9626  | 580.6           | 0.8652  | 23.03                  | 0.474        |
| 29       | 33.061         | 2.8149  | 519.6           | 0.401   | 9.16                   | 0.8974       |
| 30       | 33.781         | 2.7620  | 526.4           | 0.3853  | 8.56                   | 1.6299       |
| 31       | 34.572         | 2.7067  | 542.4           | 0.4945  | 11.54                  | 1.2261       |
| 32       | 36.048         | 2.6104  | 267.5           | 0.3383  | 4.18                   | 0.6361       |
| 33       | 36.964         | 2.5549  | 301.1           | 0.41    | 5.65                   | 1.2618       |
| 34       | 38.187         | 2.4853  | 251.2           | 0.3486  | 4.07                   | 0.4315       |
| 35       | 39.868         | 2.3973  | 189.4           | 3.6532  | 27.37                  | 4.997        |

Table S2. PXRD data table for tetrahydrate **B** (Form **I**).

| peak No. | 2 $\theta$ (°) | d (Å)   | Height (counts) | FWHM (°) | Relative intensity (%) | Asym. factor |
|----------|----------------|---------|-----------------|----------|------------------------|--------------|
| 1        | 5.011          | 17.6370 | 433.1           | 0.239    | 5.79                   | 2.8157       |
| 2        | 6.115          | 14.4622 | 36.2            | 0.4688   | 0.83                   | 0.5924       |
| 3        | 9.436          | 9.3968  | 1177.4          | 0.3417   | 16.60                  | 0.9891       |
| 4        | 10.479         | 8.4703  | 236.0           | 0.3196   | 3.16                   | 3.3676       |
| 5        | 11.663         | 7.6208  | 1243.7          | 0.6654   | 47.49                  | 0.3172       |
| 6        | 11.961         | 7.4339  | 3455.8          | 0.3161   | 53.28                  | 4.8725       |
| 7        | 13.294         | 6.6998  | 2538.2          | 0.331    | 39.50                  | 1.7058       |
| 8        | 14.115         | 6.3175  | 3346.9          | 0.2831   | 41.31                  | 4.3347       |
| 9        | 14.975         | 5.9621  | 1087.0          | 0.2962   | 14.27                  | 3.4181       |
| 10       | 15.683         | 5.6992  | 1344.5          | 0.4593   | 27.16                  | 3.804        |
| 11       | 16.841         | 5.3175  | 391.3           | 0.2541   | 3.99                   | 1.4678       |
| 12       | 17.881         | 5.0177  | 979.7           | 0.5946   | 25.90                  | 0.4803       |
| 13       | 18.591         | 4.8323  | 1049.1          | 0.7771   | 36.40                  | 0.4159       |
| 14       | 18.930         | 4.7488  | 1240.4          | 0.2362   | 12.77                  | 0.8932       |
| 15       | 19.376         | 4.6435  | 1120.3          | 0.2904   | 13.75                  | 2.3164       |
| 16       | 19.718         | 4.5662  | 1279.3          | 0.4304   | 24.21                  | 0.6884       |
| 17       | 19.917         | 4.5224  | 921.6           | 2.3907   | 100.00                 | 0.2032       |
| 18       | 21.503         | 4.2029  | 4711.5          | 0.328    | 64.77                  | 3.1223       |
| 19       | 21.992         | 4.1141  | 1761.5          | 0.3896   | 28.96                  | 2.4226       |
| 20       | 22.575         | 4.0131  | 1574.4          | 0.2823   | 18.82                  | 2.1531       |
| 21       | 23.391         | 3.8806  | 1233.4          | 0.381    | 20.31                  | 1.1631       |
| 22       | 23.862         | 3.8084  | 763.0           | 0.4022   | 12.79                  | 3.9144       |
| 23       | 24.180         | 3.7612  | 561.0           | 0.4187   | 9.74                   | 4.9863       |
| 24       | 25.443         | 3.5860  | 739.9           | 0.5201   | 16.43                  | 1.6631       |
| 25       | 27.110         | 3.3807  | 1041.3          | 0.5779   | 24.95                  | 5            |
| 26       | 27.642         | 3.3206  | 538.3           | 0.5944   | 13.84                  | 1.1222       |
| 27       | 28.543         | 3.2243  | 467.8           | 0.3045   | 6.04                   | 2.041        |
| 28       | 29.022         | 3.1756  | 532.0           | 0.3496   | 7.71                   | 4.9953       |
| 29       | 30.069         | 3.0748  | 641.2           | 0.316    | 8.52                   | 2.716        |
| 30       | 30.434         | 3.0414  | 662.6           | 0.4735   | 13.64                  | 0.9742       |
| 31       | 30.852         | 3.0042  | 589.4           | 0.2417   | 6.17                   | 1.0997       |
| 32       | 31.542         | 2.9450  | 455.7           | 0.8012   | 16.26                  | 0.4529       |
| 33       | 33.109         | 2.8204  | 662.8           | 0.693    | 19.05                  | 4.9857       |
| 34       | 34.194         | 2.7413  | 300.4           | 0.5967   | 7.80                   | 0.9489       |
| 35       | 34.956         | 2.6889  | 904.9           | 0.5208   | 20.47                  | 0.9966       |
| 36       | 36.007         | 2.6206  | 281.5           | 0.4552   | 5.57                   | 0.9633       |
| 37       | 36.916         | 2.5649  | 674.9           | 0.8842   | 26.28                  | 0.6568       |
| 38       | 38.479         | 2.4760  | 643.7           | 0.6355   | 17.34                  | 2.071        |
| 39       | 39.484         | 2.4229  | 569.8           | 0.5195   | 12.84                  | 1.025        |
| 40       | 40.949         | 2.3507  | 215.1           | 0.2978   | 2.73                   | 1.8055       |
| 41       | 41.751         | 2.3136  | 181.0           | 0.7449   | 5.63                   | 3.4609       |
| 42       | 42.477         | 2.2814  | 174.2           | 0.666    | 4.93                   | 1.9006       |

Table S3. PXRD data table for aCD·1.3(CH<sub>3</sub>)<sub>2</sub>CO·2.7H<sub>2</sub>O clathrate prepared in “hexahydrate+desiccant+guest” system (columnar packing type).

| peak No. | 2θ (°) | d(Å)    | Height (counts) | FWHM (°) | Relative intensity (%) | Asym. factor |
|----------|--------|---------|-----------------|----------|------------------------|--------------|
| 1        | 5.692  | 15.5338 | 202.8           | 0.3204   | 3.07                   | 1.2243       |
| 2        | 7.451  | 11.8800 | 1932.3          | 0.3081   | 29.56                  | 1.3056       |
| 3        | 9.664  | 9.1778  | 170.8           | 0.3959   | 3.57                   | 3.2849       |
| 4        | 11.470 | 7.7474  | 710.9           | 0.5855   | 28.26                  | 0.6397       |
| 5        | 12.989 | 6.8542  | 2058.8          | 0.4621   | 52.69                  | 2.3407       |
| 6        | 14.914 | 5.9862  | 418.0           | 0.5081   | 10.38                  | 1.9101       |
| 7        | 16.164 | 5.5341  | 356.4           | 0.6917   | 12.09                  | 1.8234       |
| 8        | 17.126 | 5.2316  | 202.7           | 0.5312   | 5.63                   | 0.8144       |
| 9        | 18.408 | 4.8788  | 246.3           | 7.1875   | 100.00                 | 0.2476       |
| 10       | 19.845 | 4.5382  | 3240.4          | 0.4965   | 80.19                  | 1.4838       |
| 11       | 22.512 | 4.0237  | 591.4           | 1.0086   | 28.92                  | 2.1096       |
| 12       | 27.075 | 3.3848  | 210.0           | 0.7638   | 8.00                   | 0.7067       |
| 14       | 33.667 | 2.7790  | 132.7           | 2.064    | 11.82                  | 0.7339       |



Table S4. PXRD data table for aCD·1.1EtCN·3.6H<sub>2</sub>O clathrate prepared in “hexahydrate+desiccant+guest” system (Form III packing type).

| peak No. | 2θ (°) | d(Å)    | Height (counts) | FWHM(°) | Relative intensity (%) | Asym. factor |
|----------|--------|---------|-----------------|---------|------------------------|--------------|
| 1        | 4.693  | 18.8145 | 622.5           | 0.2244  | 12.6                   | 1.4836       |
| 2        | 6.743  | 13.0991 | 121.0           | 0.3125  | 2.5                    | 2.9897       |
| 3        | 8.014  | 11.0236 | 194.8           | 0.4374  | 5.9                    | 3.6165       |
| 4        | 9.398  | 9.4026  | 934.2           | 0.2643  | 16.4                   | 1.7307       |
| 5        | 9.627  | 9.1799  | 1070.7          | 0.281   | 20.2                   | 0.959        |
| 6        | 10.468 | 8.4442  | 243.4           | 0.2053  | 3.2                    | 1.4706       |
| 7        | 11.712 | 7.5495  | 2481.2          | 0.2871  | 49.2                   | 2.1308       |
| 8        | 12.225 | 7.2342  | 1339.9          | 0.8305  | 84.1                   | 0.2518       |
| 9        | 12.547 | 7.0493  | 1973.4          | 0.2026  | 27.9                   | 1.7335       |
| 10       | 13.294 | 6.6547  | 4389.4          | 0.3285  | 100.0                  | 1.9593       |
| 11       | 13.705 | 6.4559  | 647.7           | 0.2485  | 11.2                   | 1.9837       |
| 12       | 14.684 | 6.0277  | 1059.4          | 0.2932  | 21.5                   | 2.0316       |
| 13       | 15.564 | 5.6889  | 330.8           | 0.4144  | 12.2                   | 0.5476       |
| 14       | 16.339 | 5.4207  | 639.7           | 0.4253  | 19.5                   | 4.9811       |
| 15       | 17.031 | 5.2020  | 315.3           | 0.5264  | 14.5                   | 0.6545       |
| 16       | 17.678 | 5.0131  | 360.6           | 0.2259  | 6.5                    | 1.6164       |
| 17       | 18.185 | 4.8745  | 1231.7          | 0.3709  | 37.2                   | 1.2991       |
| 18       | 18.961 | 4.6765  | 906.9           | 0.3064  | 21.8                   | 1.8611       |
| 19       | 19.612 | 4.5229  | 1796.2          | 0.4911  | 70.8                   | 1.461        |
| 20       | 20.079 | 4.4188  | 1571.5          | 0.3228  | 40.2                   | 1.6421       |
| 21       | 21.108 | 4.2056  | 1111.8          | 0.3829  | 33.7                   | 1.658        |
| 22       | 21.615 | 4.1080  | 931.9           | 0.3834  | 26.1                   | 3.9454       |
| 23       | 22.247 | 3.9928  | 4017.2          | 0.4685  | 139.6                  | 3.2879       |
| 24       | 23.138 | 3.8410  | 1290.7          | 0.7091  | 73.5                   | 1.463        |
| 25       | 24.643 | 3.6098  | 231.3           | 0.4499  | 8.6                    | 1.1261       |
| 26       | 25.522 | 3.4874  | 650.7           | 0.3749  | 17.5                   | 4.9323       |
| 27       | 26.213 | 3.3970  | 92.7            | 0.2041  | 1.8                    | 0.2803       |
| 28       | 26.905 | 3.3112  | 382.1           | 0.3655  | 11.3                   | 1.3058       |
| 29       | 27.797 | 3.2068  | 388.3           | 0.4515  | 15.0                   | 0.8041       |
| 30       | 28.463 | 3.1333  | 423.0           | 0.3488  | 11.6                   | 1.7515       |
| 31       | 29.140 | 3.0620  | 353.4           | 0.297   | 8.6                    | 1.182        |
| 32       | 30.574 | 2.9216  | 259.9           | 0.5498  | 11.4                   | 1.5737       |
| 33       | 31.222 | 2.8625  | 488.5           | 0.7436  | 32.6                   | 0.4897       |
| 34       | 33.045 | 2.7086  | 518.8           | 0.4298  | 16.6                   | 3.2194       |
| 35       | 34.418 | 2.6036  | 343.4           | 1.2004  | 32.0                   | 2.0452       |
| 36       | 37.122 | 2.4199  | 181.0           | 0.257   | 3.3                    | 5            |
| 37       | 38.334 | 2.3462  | 150.2           | 0.1883  | 2.4                    | 2.2309       |
| 38       | 39.544 | 2.2771  | 235.8           | 0.9469  | 19.6                   | 1.8003       |

## X-Ray powder diffractograms

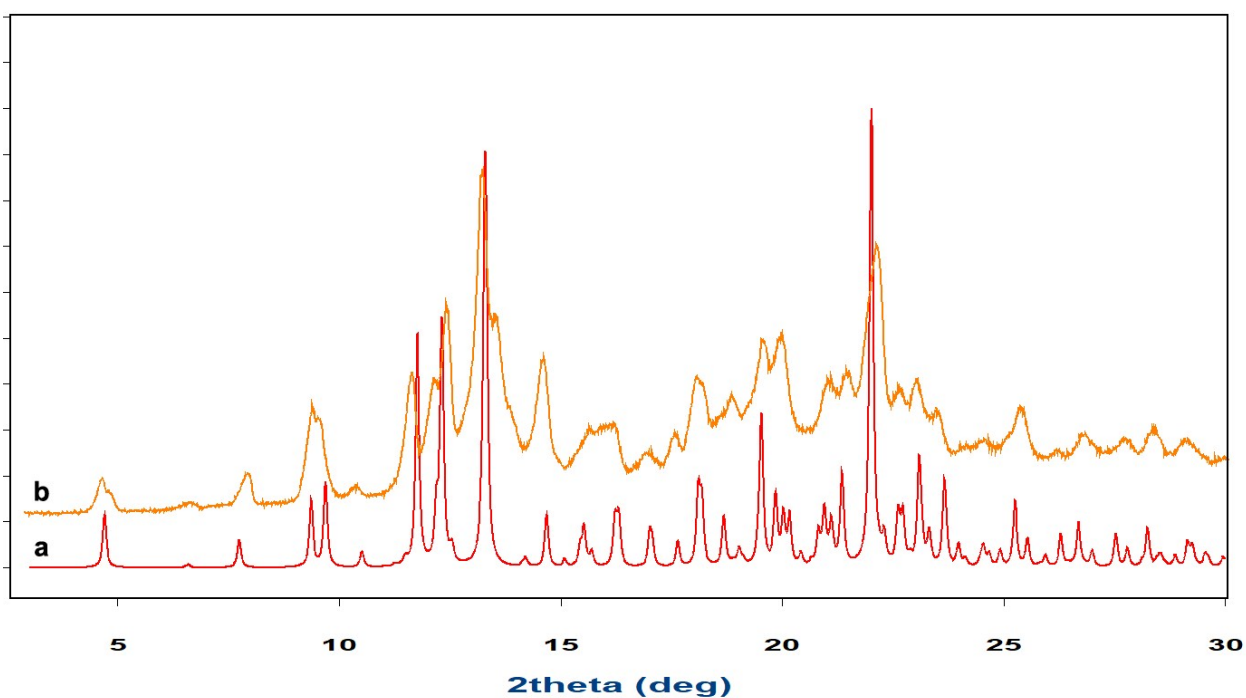

Figure S28. Powder diffractograms for: (a) aCD·7.57H<sub>2</sub>O hydrate (Form III) simulated from single crystal XRD data<sup>1</sup>; (b) aCD·0.9EtCN·3.8H<sub>2</sub>O prepared from tetrahydrate A.

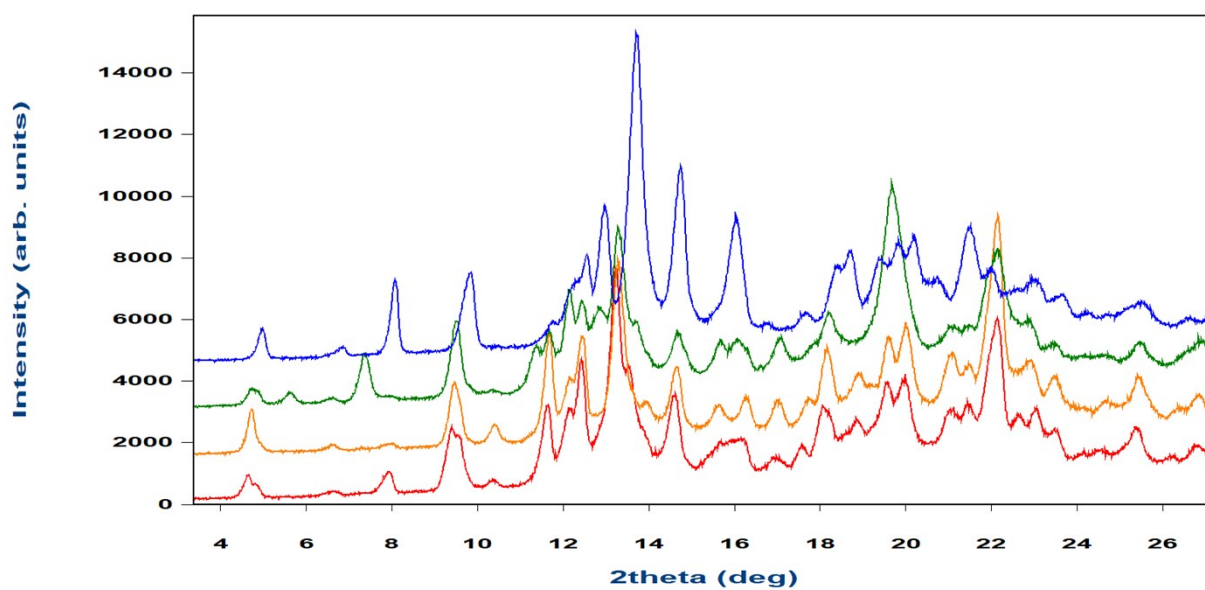

Figure S29. Powder diffractograms for clathrates prepared from aCD tetrahydrate A: (red) aCD·0.9C<sub>2</sub>H<sub>5</sub>CN·3.8H<sub>2</sub>O; (orange) aCD·1.4CH<sub>3</sub>NO<sub>2</sub>·2.0H<sub>2</sub>O; (green) aCD·1.2(CH<sub>3</sub>)<sub>2</sub>CO·2.3H<sub>2</sub>O; (blue) aCD·0.4CH<sub>2</sub>Cl<sub>2</sub>·3.0H<sub>2</sub>O.

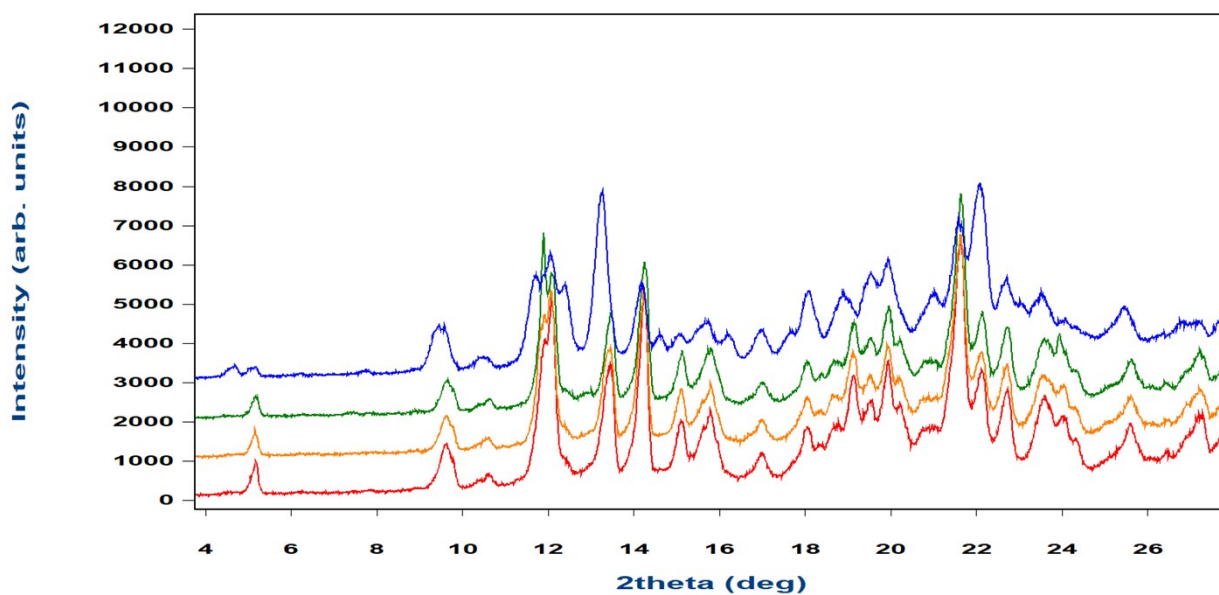

Figure S30. Powder diffractograms for clathrates prepared from aCD tetrahydrate **B**: (red)  $\text{aCD} \cdot 0.5n\text{-C}_3\text{H}_7\text{OH} \cdot 4.7\text{H}_2\text{O}$ ; (orange)  $\text{aCD} \cdot 0.3\text{CH}_2\text{Cl}_2 \cdot 4.0\text{H}_2\text{O}$ ; (green)  $\text{aCD} \cdot 0.3(\text{CH}_3)_2\text{CO} \cdot 4.0\text{H}_2\text{O}$ ; (blue)  $\text{aCD} \cdot 1.0\text{C}_2\text{H}_5\text{CN} \cdot 4.1\text{H}_2\text{O}$ .

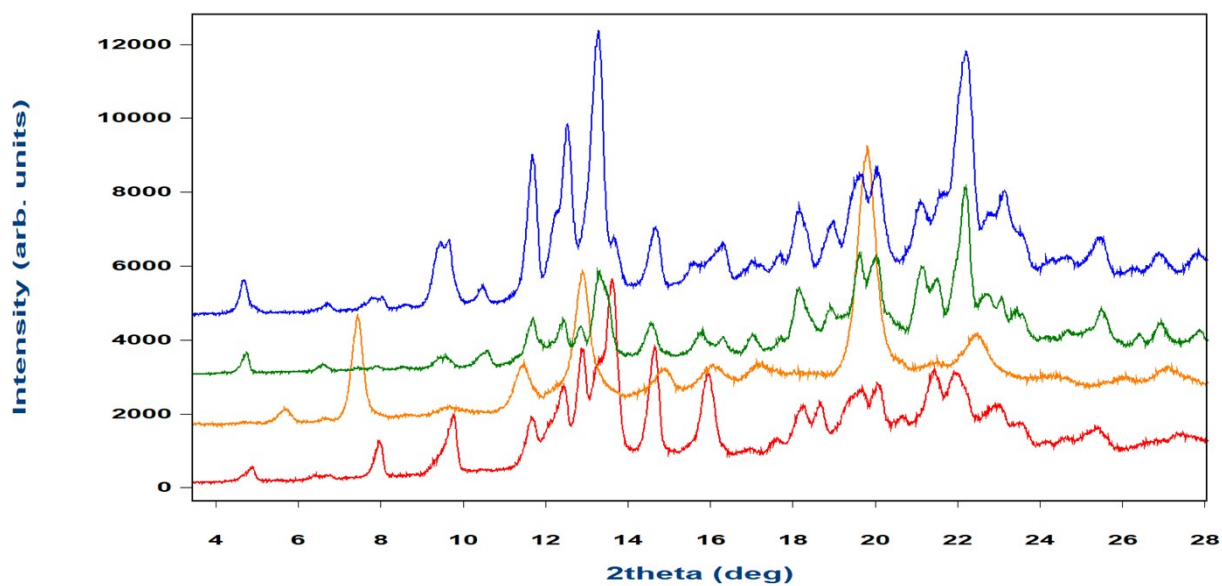

Figure S31. Powder diffractograms for aCD clathrates prepared in "hexahydrate+desiccant+guest" system: (red)  $\text{aCD} \cdot 1.1n\text{-C}_3\text{H}_7\text{OH} \cdot 3.0\text{H}_2\text{O}$ ; (orange)  $\text{aCD} \cdot 1.3(\text{CH}_3)_2\text{CO} \cdot 2.7\text{H}_2\text{O}$ ; (green)  $\text{aCD} \cdot 1.0\text{CH}_2\text{Cl}_2 \cdot 2.0\text{H}_2\text{O}$ ; (blue)  $\text{aCD} \cdot 1.1\text{C}_2\text{H}_5\text{CN} \cdot 3.6\text{H}_2\text{O}$ .

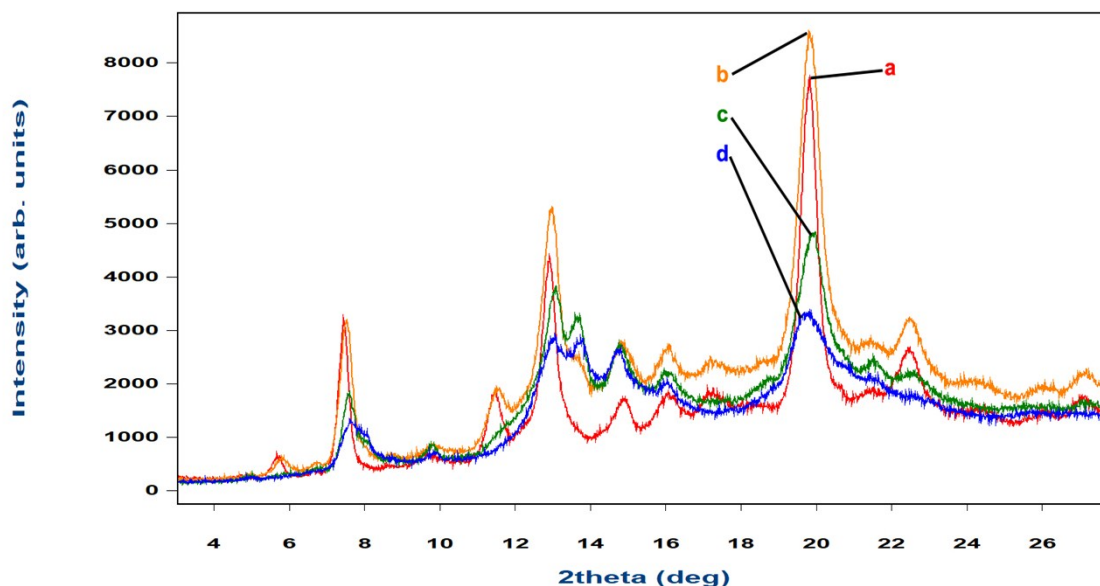

Figure S32. Powder diffractograms for columnar phase of (a) aCD·1.3(CH<sub>3</sub>)<sub>2</sub>CO·2.7H<sub>2</sub>O prepared in “hexahydrate+desiccant+guest” system and products of its heating: (b) aCD·0.6(CH<sub>3</sub>)<sub>2</sub>CO·1.9H<sub>2</sub>O annealed at 90°C in vacuum; (c) aCD·0.3(CH<sub>3</sub>)<sub>2</sub>CO·1.6H<sub>2</sub>O annealed at 120°C in vacuum; (d) aCD·0.7H<sub>2</sub>O annealed at 180°C.

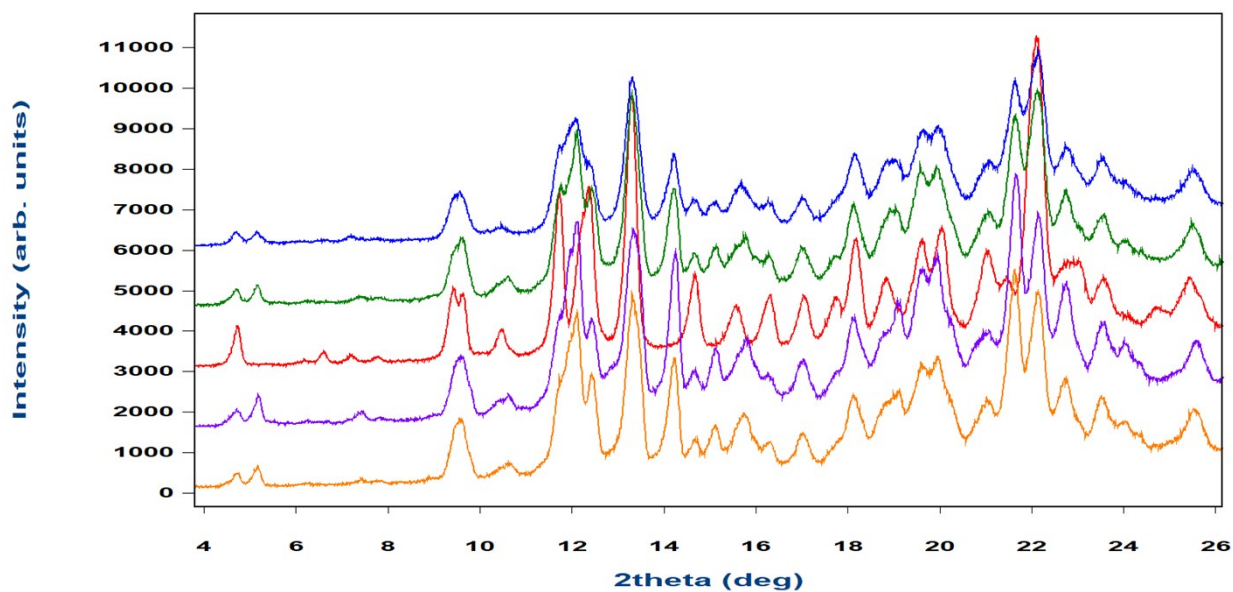

Figure S33. Powder diffractograms of aCD clathrates prepared with saturation of aCD hexahydrate with vapor of: (red) nitromethane; (orange) 1-propanol; (green) propionitrile; (blue) dichloromethane; (violet) acetone. No desiccant was added.

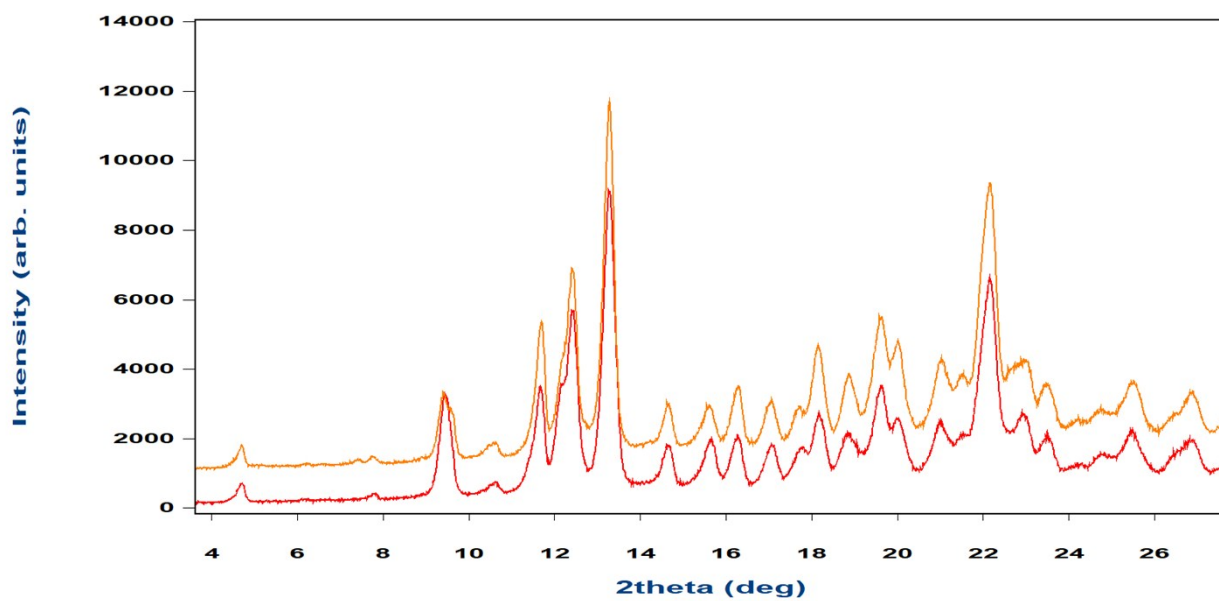

Figure 34. Powder diffractograms of aCD clathrates prepared with saturation of aCD hexahydrate with vapor of: (red) methanol; (orange) ethanol. No desiccant was added.

### Indexation of X-Ray powder diffractogram for anhydrous aCD

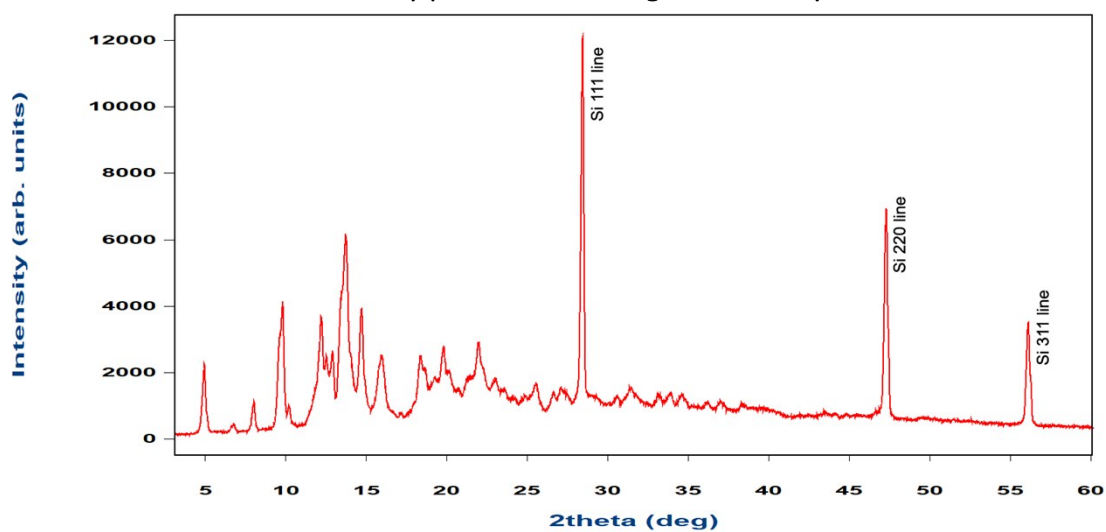

Figure S35. Powder diffractogram of anhydrous aCD<sup>1</sup> with peaks of SRM 640d standard.

Table S5. Unit cell parameters for various forms of aCD\*

|                                                  | a, Å   | b, Å   | c, Å  | V, Å <sup>3</sup> |
|--------------------------------------------------|--------|--------|-------|-------------------|
| Form IIIa (anhydrous aCD)                        | 14.135 | 36.030 | 7.437 | 3787.41           |
| Form III (aCD·7.57H <sub>2</sub> O) <sup>2</sup> | 14.356 | 37.538 | 9.400 | 5065.62           |
| Form I (aCD·6H <sub>2</sub> O) <sup>3</sup>      | 13.700 | 29.35  | 11.92 | 4792.97           |

\* All forms have P2<sub>1</sub>2<sub>1</sub>2<sub>1</sub> space group.

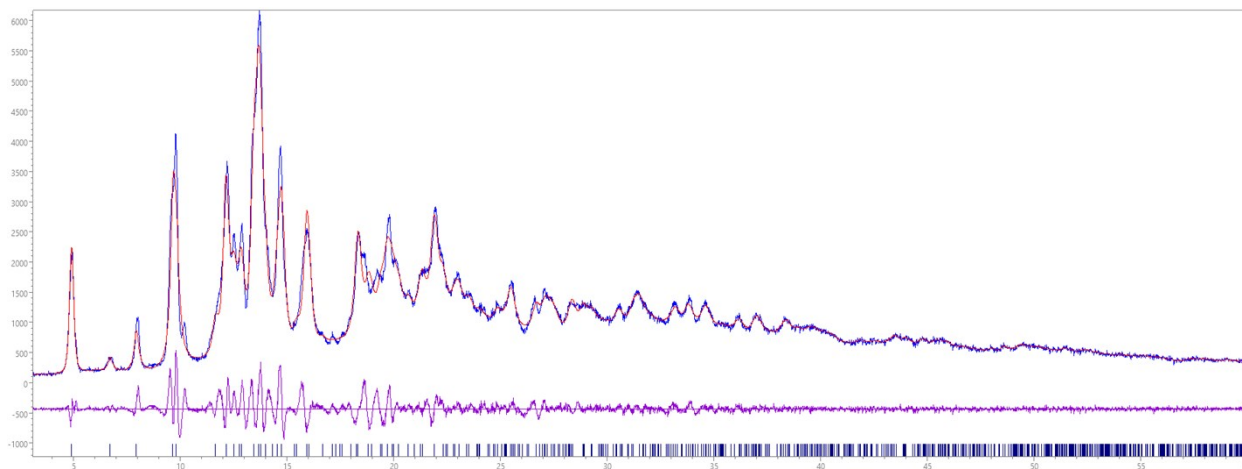

Figure S36. Experimental XRPD pattern (blue), best fit (red) and differential curve (purple) for dried aCD ( $R_{wp} = 6.781$ ). Blue vertical bars represent Bragg positions for the calculated unit cell and P2<sub>1</sub>2<sub>1</sub>2<sub>1</sub> space group.

## Sorption isotherm data

Table S6. Data on the sorption isotherm of 1-propanol with initially anhydrous aCD for simultaneous sorption of guest and water at constant guest/water molar ratio 1:17.

| 1-propanol activity,<br>$P/P_0$ | 1-propanol inclusion,<br>mol per mol aCD, $A$ | Sorption affinity,<br>$A/(P/P_0)$ | aCD hydration, mol<br>water per mol aCD, $h$ | Hydration degree<br>$h/h_{\max}$ |
|---------------------------------|-----------------------------------------------|-----------------------------------|----------------------------------------------|----------------------------------|
| 0.0001                          | 0.0001                                        | $\sim 1$                          | 0.1                                          | 0.02                             |
| 0.0007                          | 0.06                                          | 81.5                              | 1.0                                          | 0.17                             |
| 0.0014                          | 0.12                                          | 84.6                              | 2.1                                          | 0.35                             |
| 0.0220                          | 0.17                                          | 7.9                               | 3.0                                          | 0.50                             |
| 0.0194                          | 0.24                                          | 12.4                              | 4.2                                          | 0.69                             |
| 0.0415                          | 0.27                                          | 6.5                               | 4.7                                          | 0.78                             |

### Data on kinetics of dehydration for tetrahydrate A

Table S7. Activation energy  $E_a$  and logarithm of the pre-exponential factor  $A$  for the reaction of aCD dehydration obtained by various approximation methods.

| Model                                                                                      | Method           | $E_a$ , kJ·mol <sup>-1</sup> | log $A$ , s <sup>-1</sup> |
|--------------------------------------------------------------------------------------------|------------------|------------------------------|---------------------------|
| -                                                                                          | Friedman         | 74±11.5                      | 8.51                      |
| -                                                                                          | Ozawa-Flynn-Wall | 74±9.3                       | 8.59                      |
| An, $n$ -dimensional nucleation according to Avrami-Erofeev (n=0.58)<br>Corr. coef 0.99915 | lin. regr.       | 79                           | 9.15                      |

Friedman Analysis

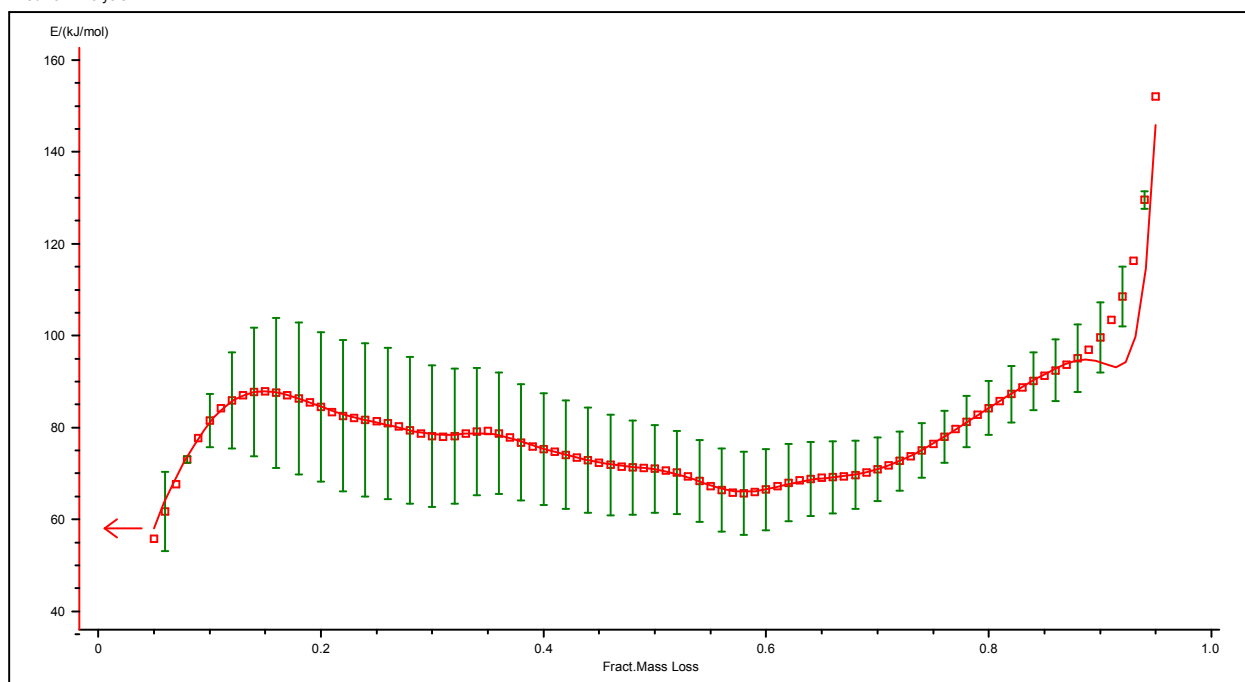

Figure S37. Friedman analysis for the process of the tetrahydrate A dehydration.



Ozawa-Flynn-Wall Analysis

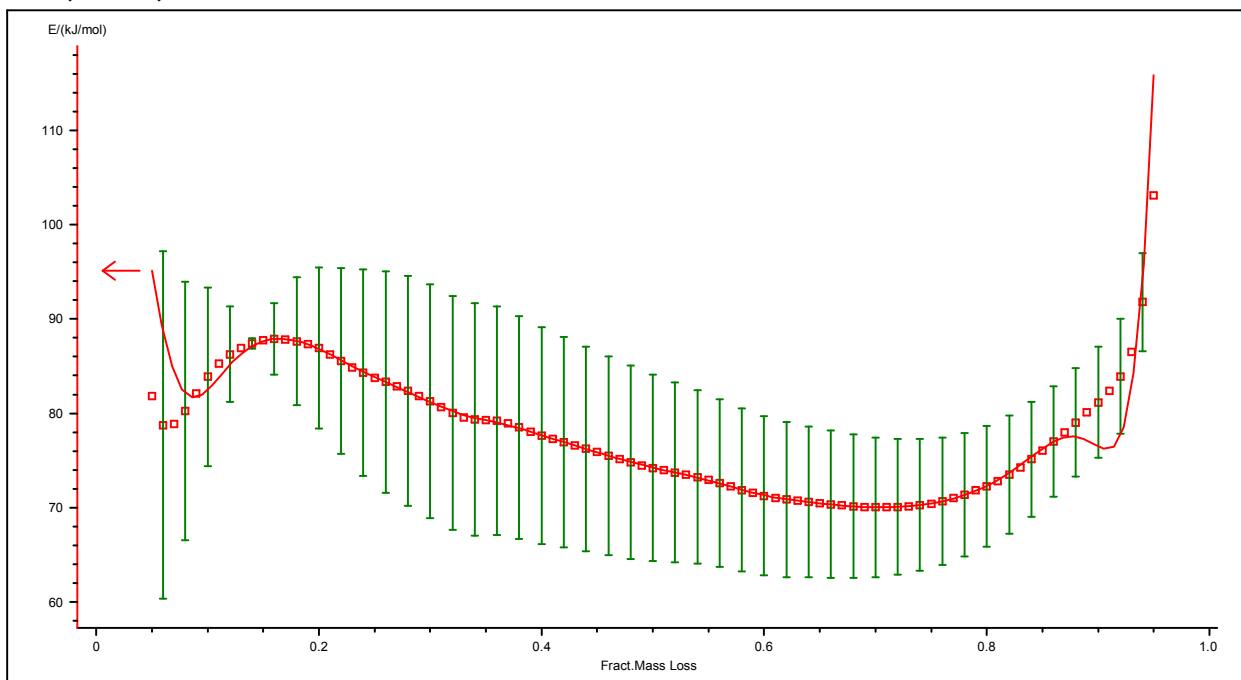

Figure S38. Ozawa-Flynn-Wall analysis for the process of the tetrahydrate A dehydration.

NETZSCH Thermokinetics TetraA

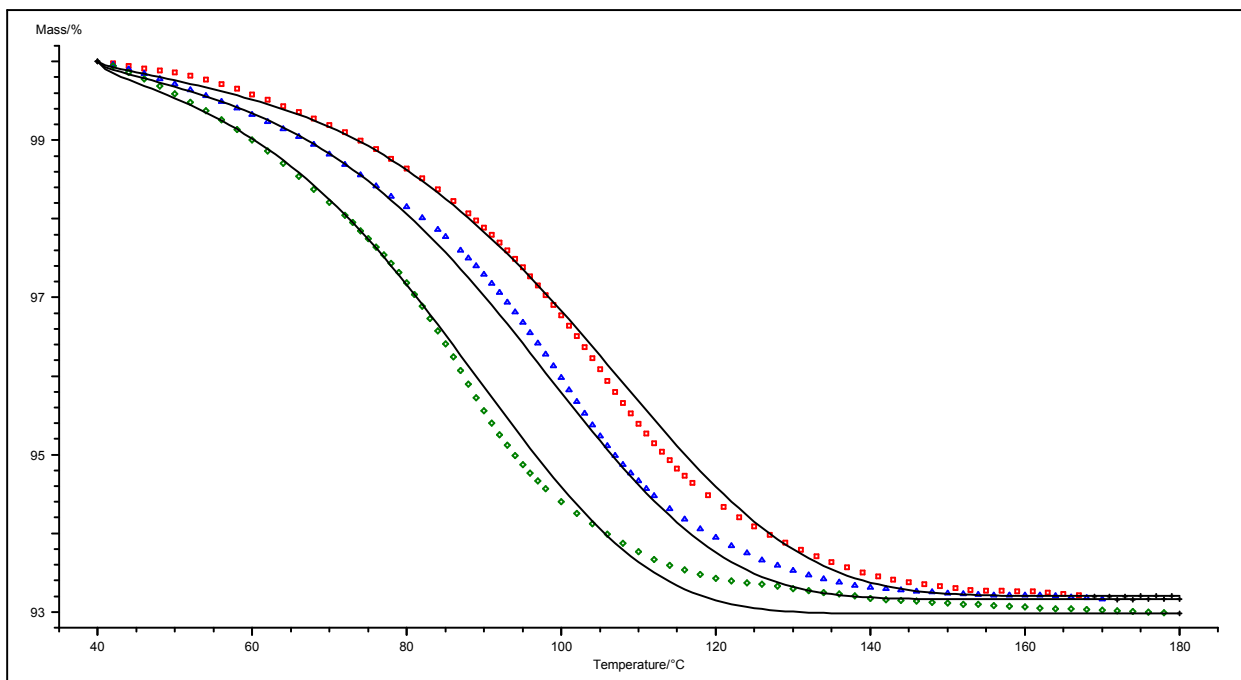

Figure S39. Approximation of TG curves with model method ( $A_n$ , n - dimensional nucleation according to Avrami-Erofeev).

### Data on kinetics of dehydration for tetrahydrate B

Table S8. Activation energy  $E_a$  and logarithm of the pre-exponential factor  $A$  for the reaction of aCD dehydration obtained by various approximation methods.

| Model                                                                                                | Method           | $E_a$ , kJ·mol <sup>-1</sup> | log $A$ , s <sup>-1</sup> |
|------------------------------------------------------------------------------------------------------|------------------|------------------------------|---------------------------|
| -                                                                                                    | Friedman         | 47±15.8                      | 4.34                      |
| -                                                                                                    | Ozawa-Flynn-Wall | 49±12.1                      | 4.60                      |
| CnB, reaction of $n^{\text{th}}$ order with autocatalysis by product (n=1.39)<br>Corr. coeff. 0.9965 | lin. regr.       | 52                           | 4.99                      |

Friedman Analysis

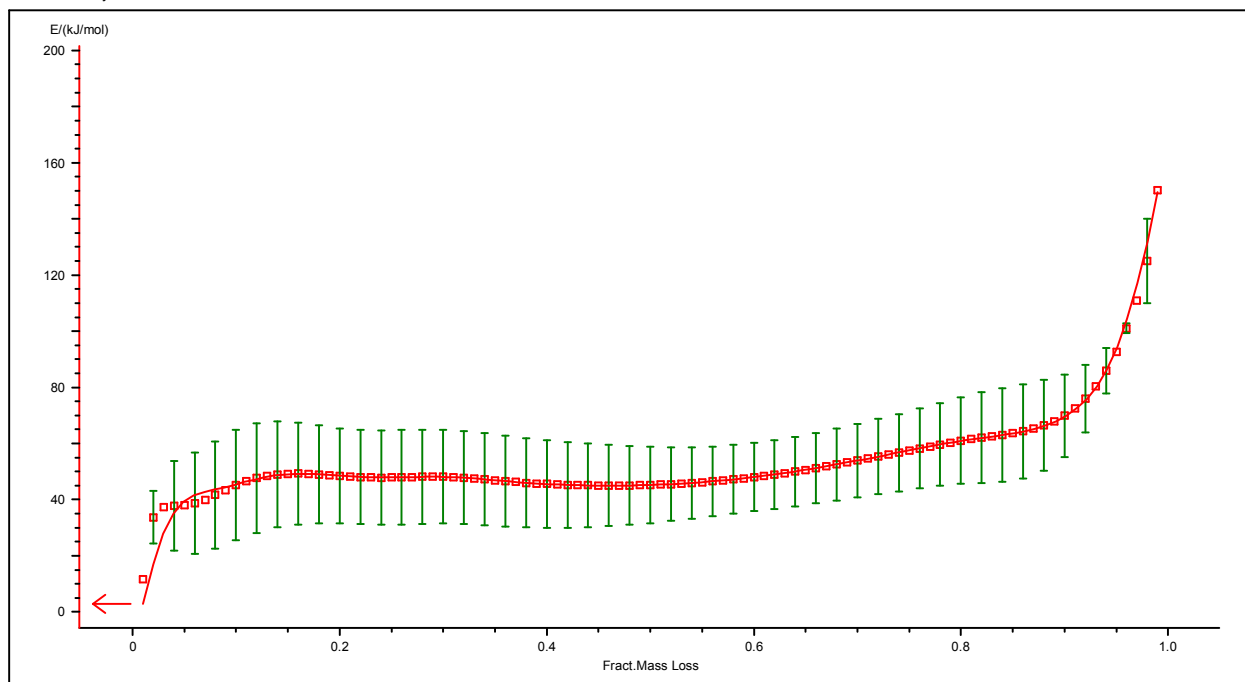

Figure S40. Friedman analysis for the process of the tetrahydrate **B** dehydration.

Ozawa-Flynn-Wall Analysis

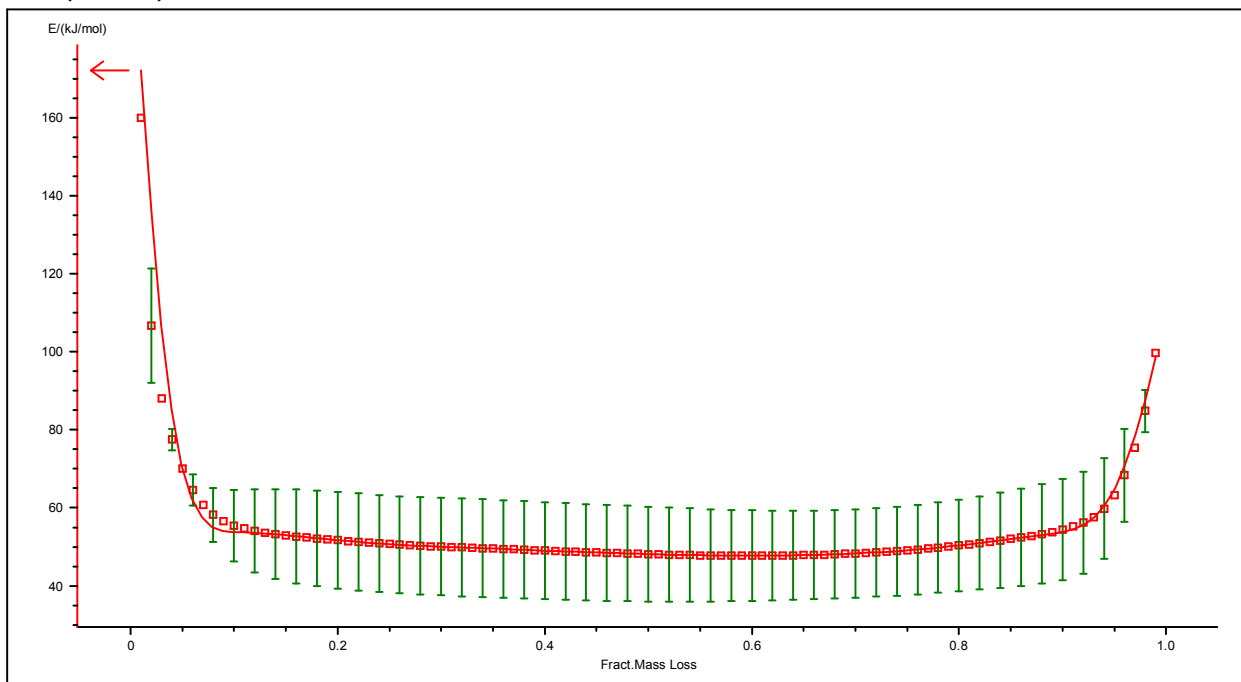

Figure S41. Ozawa-Flynn-Wall analysis for the process of the tetrahydrate **B** dehydration.

NETZSCH Thermokinetics TetraB

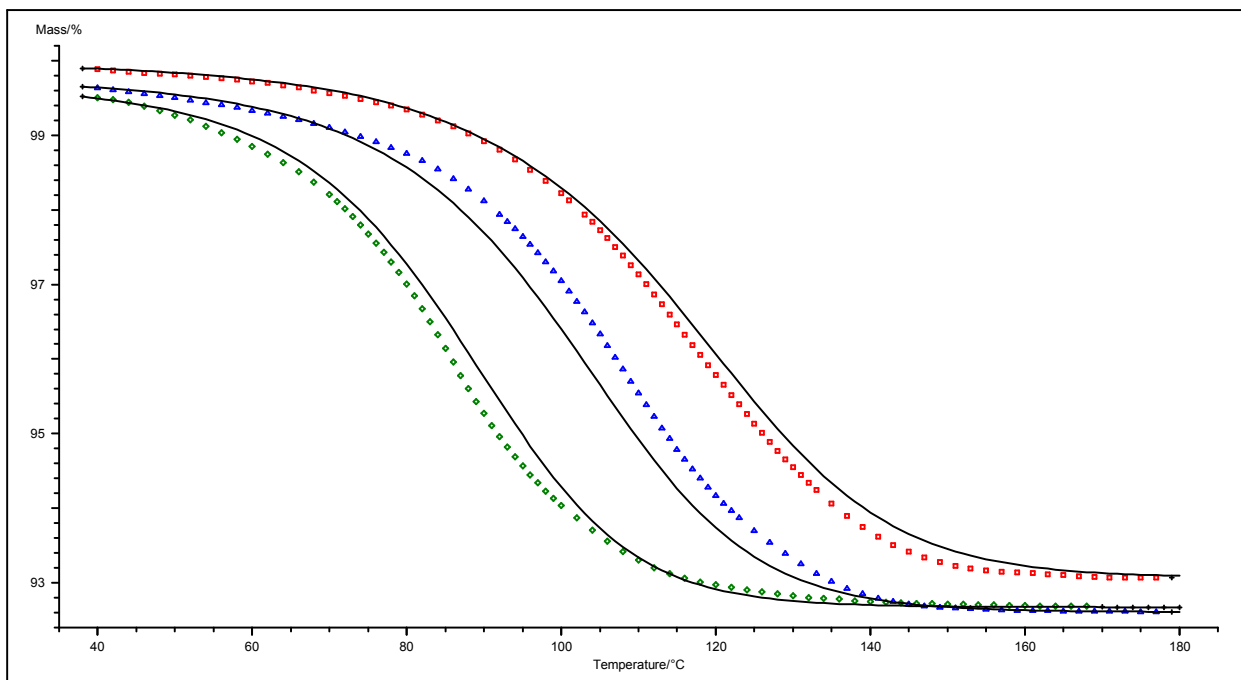

Figure S42. Approximation of TG curves with model method (CnB, n-th order with autocatalysis with product).

### Data on kinetics of water and EtCN release from ternary aCD clathrates

Table S9. Activation energy  $E_a$  and logarithm of the pre-exponential factor  $A$  for the reaction of water removal (1<sup>st</sup> step of decomposition) from aCD·0.9C<sub>2</sub>H<sub>5</sub>CN·3.8H<sub>2</sub>O prepared from tetrahydrate **A**.

| Model                                                                        | Method           | $E_a$ , kJ·mol <sup>-1</sup> | log $A$ , s <sup>-1</sup> |
|------------------------------------------------------------------------------|------------------|------------------------------|---------------------------|
| -                                                                            | Friedman         | 69±16.6                      | 7.78                      |
| -                                                                            | Ozawa-Flynn-Wall | 68±7.0                       | 7.58                      |
| Fn (reaction of $n^{\text{th}}$ order,<br>$n=1.72$ )<br>Corr. coeff. 0.99902 | lin. regr.       | 66                           | 7.40                      |

Table S10. Activation energy  $E_a$  and logarithm of the pre-exponential factor  $A$  for the reaction of EtCN removal (2<sup>nd</sup> step of decomposition) from aCD·0.9C<sub>2</sub>H<sub>5</sub>CN·3.8H<sub>2</sub>O prepared from tetrahydrate **A**.

| Model                                                                             | Method           | $E_a$ , kJ·mol <sup>-1</sup> | log $A$ , s <sup>-1</sup> |
|-----------------------------------------------------------------------------------|------------------|------------------------------|---------------------------|
| -                                                                                 | Friedman         | 107-159                      | 9.7-15.4                  |
| -                                                                                 | Ozawa-Flynn-Wall | 106-138                      | 9.8-13.6                  |
| D1F, one-dimensional<br>diffusion according to<br>Fick's law<br>Corr. coef 0.9989 | lin. regr.       | 117                          | 9.79                      |

Table S11. Activation energy  $E_a$  and logarithm of the pre-exponential factor  $A$  for the reaction of water removal (1<sup>st</sup> step of decomposition) from aCD·1.0C<sub>2</sub>H<sub>5</sub>CN·4.1H<sub>2</sub>O prepared from tetrahydrate **B**.

| Model                                                                                                           | Method           | $E_a$ , kJ·mol <sup>-1</sup> | log $A$ , s <sup>-1</sup> |
|-----------------------------------------------------------------------------------------------------------------|------------------|------------------------------|---------------------------|
| -                                                                                                               | Friedman         | 56±13.4                      | 5.84                      |
| -                                                                                                               | Ozawa-Flynn-Wall | 56±12.2                      | 5.73                      |
| CnB, reaction of $n^{\text{th}}$ order<br>with autocatalysis by<br>product<br>( $n=1.37$ )<br>Corr. coef 0.9971 | lin. regr.       | 58                           | 5.90                      |

Table S12. Activation energy  $E_a$  and logarithm of the pre-exponential factor  $A$  for the reaction of EtCN removal (2<sup>nd</sup> step of decomposition) from aCD·1.0C<sub>2</sub>H<sub>5</sub>CN·4.1H<sub>2</sub>O prepared from tetrahydrate **B**.

| Model                                                                                                  | Method           | $E_a$ , kJ·mol <sup>-1</sup> | log $A$ , s <sup>-1</sup> |
|--------------------------------------------------------------------------------------------------------|------------------|------------------------------|---------------------------|
| -                                                                                                      | Friedman         | 113-171                      | 10.2-16.5                 |
| -                                                                                                      | Ozawa-Flynn-Wall | 90-145                       | 8.3-13.5                  |
| An, $n$ -dimensional<br>nucleation according to<br>Avrami-Erofeev<br>( $n=0.87$ )<br>Corr. coef 0.9980 | lin. regr.       | 127                          | 11.9                      |

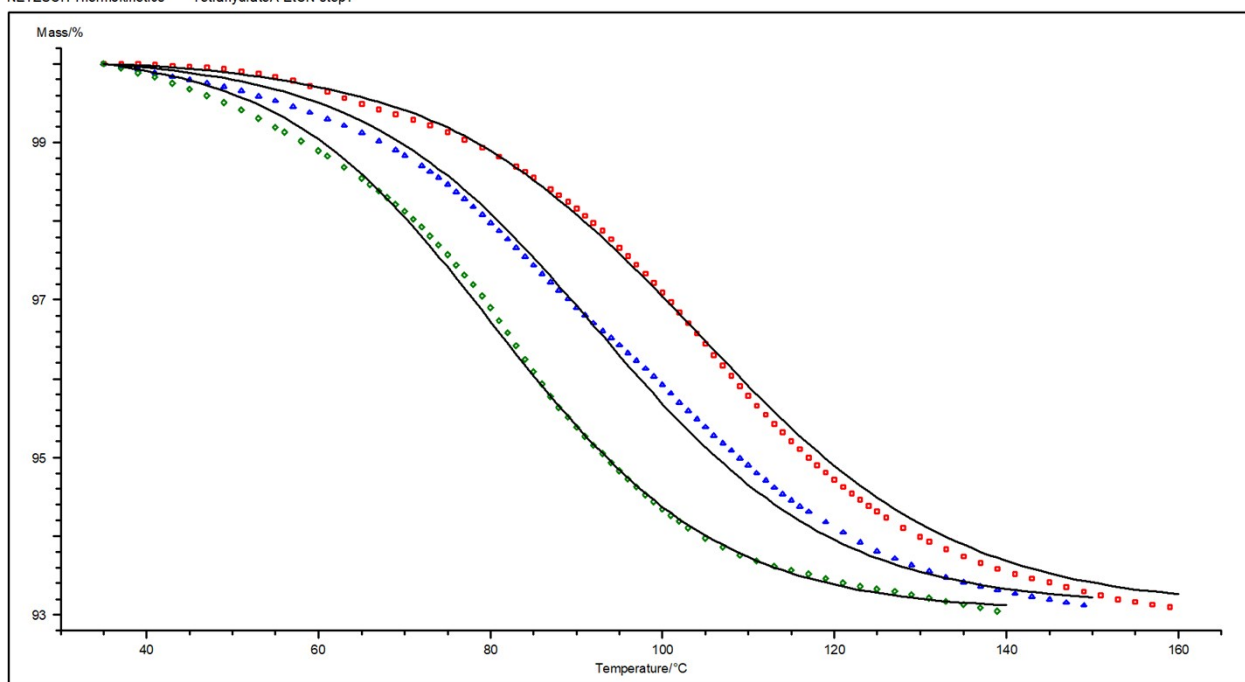

Figure S43. Approximation of TG curves (1 step for aCD·0.9C<sub>2</sub>H<sub>5</sub>CN·3.8H<sub>2</sub>O prepared from tetrahydrate A) with model method (Fn).

## Friedman Analysis

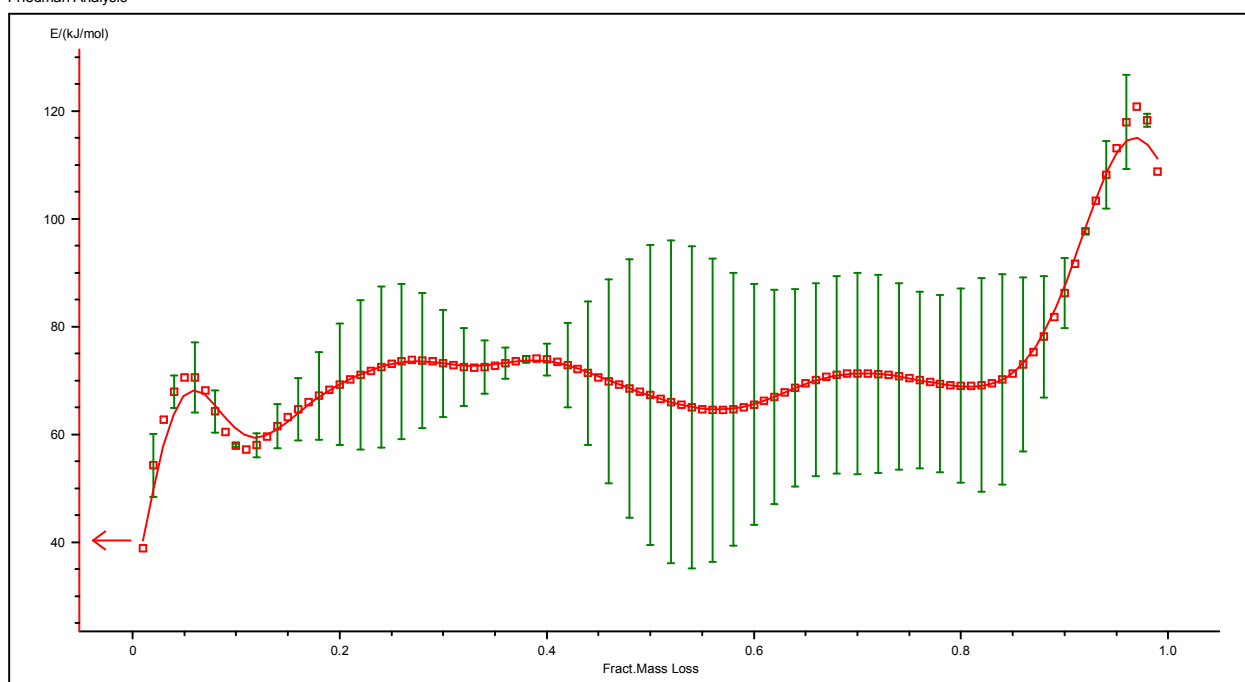

Figure S44. Friedman analysis for the 1 step of decomposition of aCD·0.9C<sub>2</sub>H<sub>5</sub>CN·3.8H<sub>2</sub>O prepared from tetrahydrate A

Ozawa-Flynn-Wall Analysis

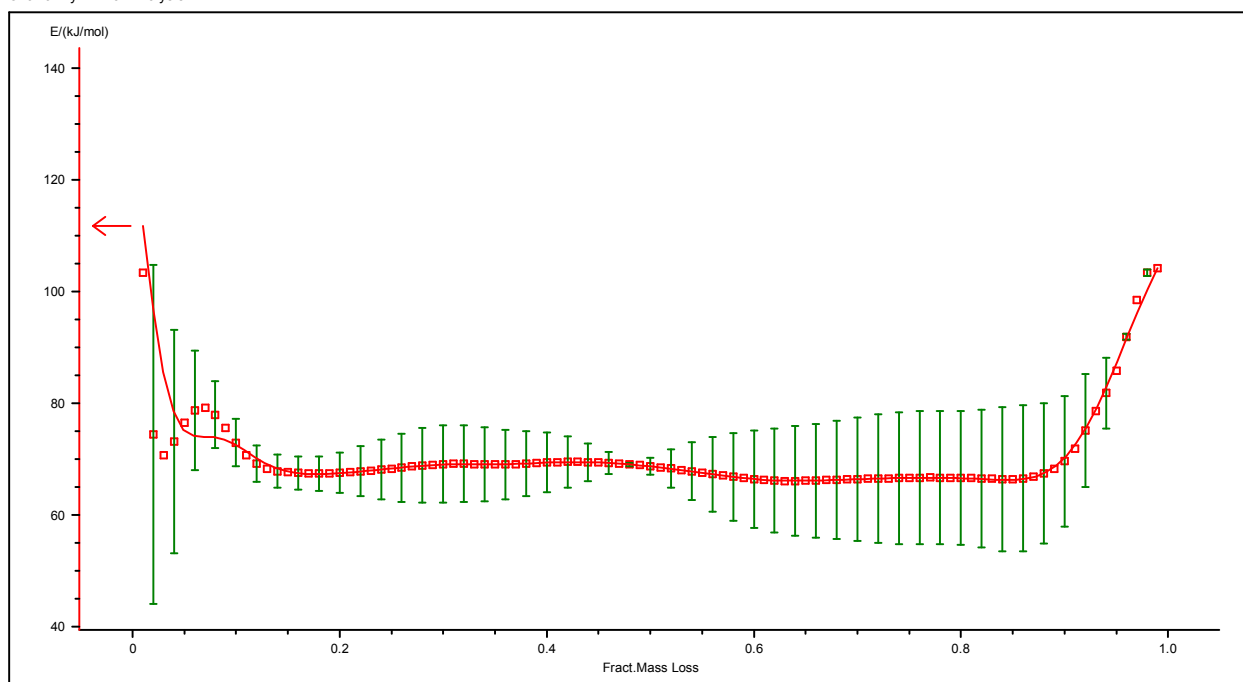

Figure S45. Ozawa-Flynn-Wall analysis for the 1 step of decomposition of  $aCD \cdot 0.9C_2H_5CN \cdot 3.8H_2O$  prepared from tetrahydrate **A**

NETZSCH Thermokinetics TetrahydrateA-EtCN-2step

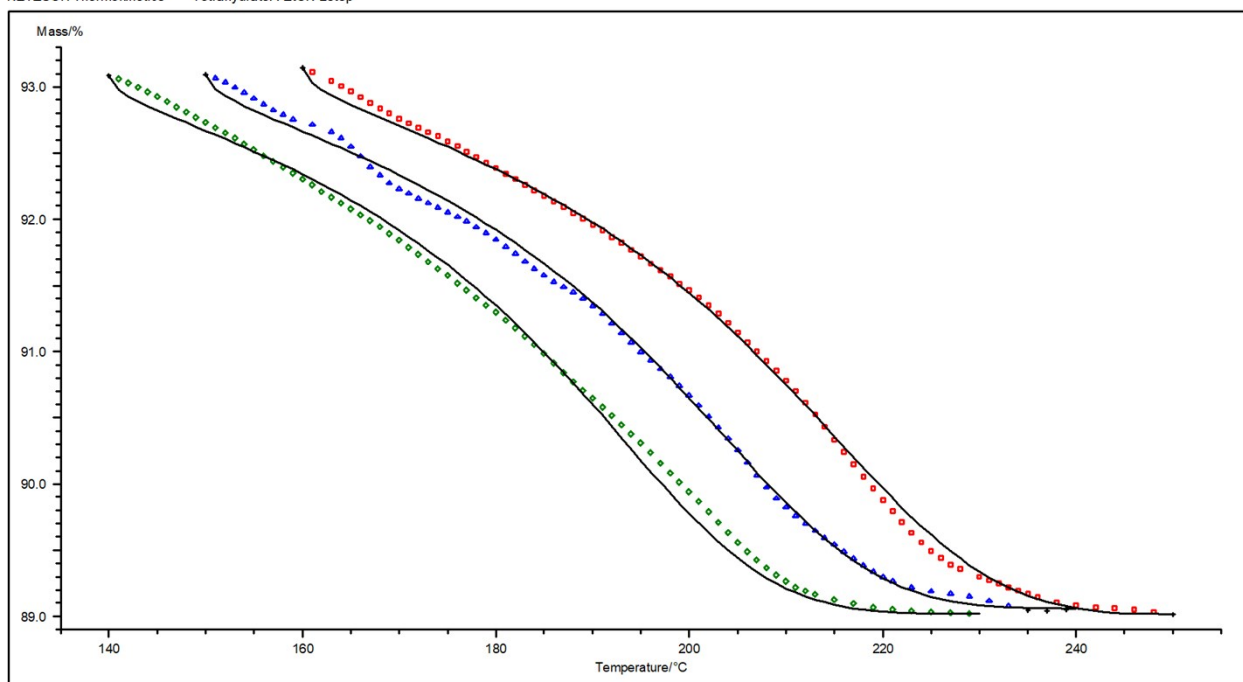

Figure S46. Approximation of TG curves (2nd step for  $aCD \cdot 0.9C_2H_5CN \cdot 3.8H_2O$  prepared from tetrahydrate **A**) with model method (D1F).

Friedman Analysis

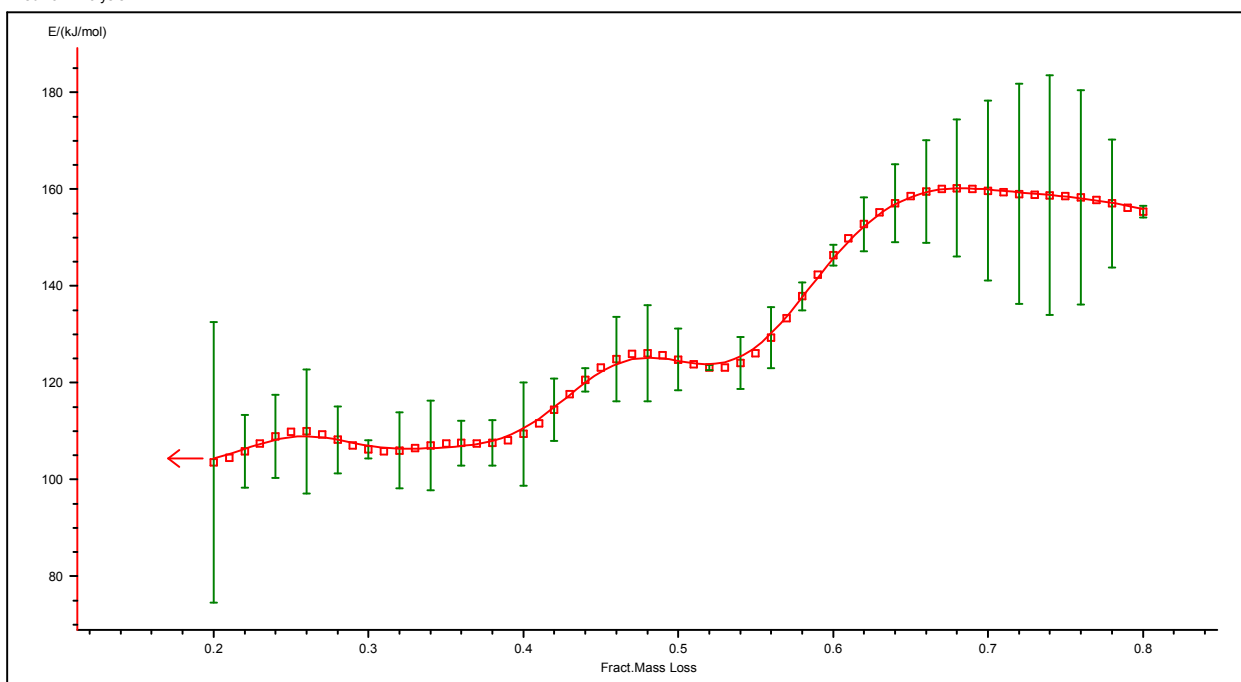

Figure S47. Friedman analysis for the 2nd step of decomposition of  $aCD \cdot 0.9C_2H_5CN \cdot 3.8H_2O$  prepared from tetrahydrate **A**

Ozawa-Flynn-Wall Analysis

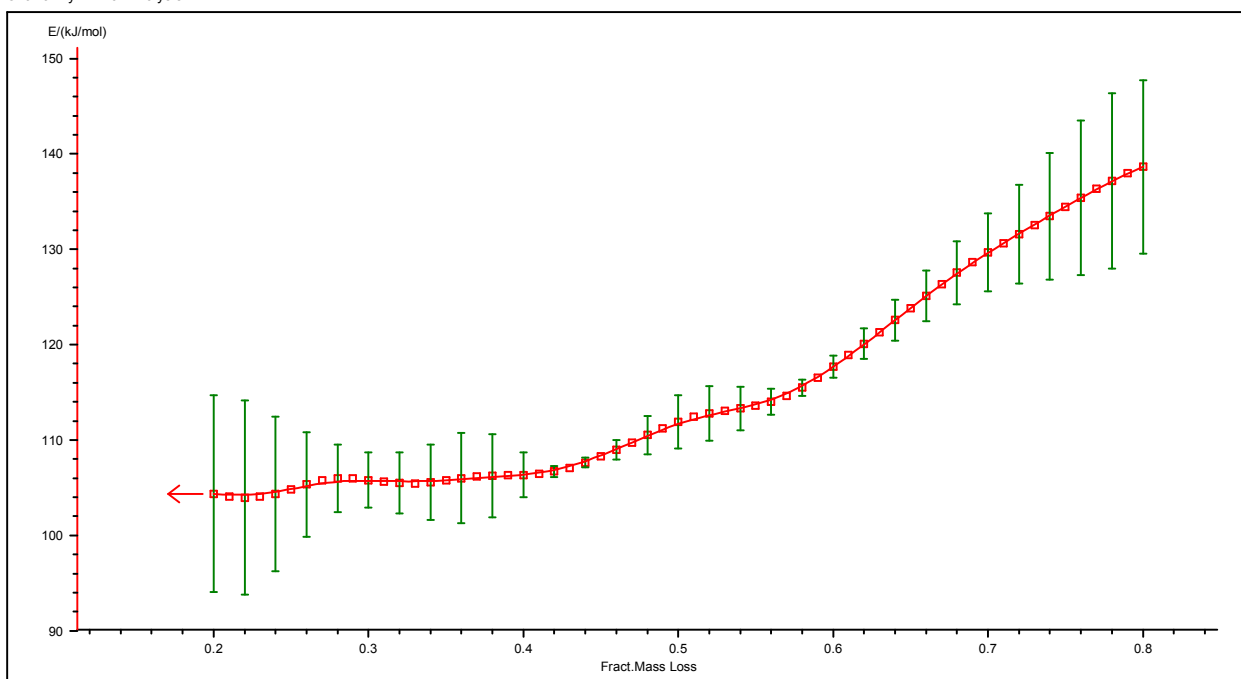

Figure S48. Ozawa-Flynn-Wall analysis for the 2nd step of decomposition of  $aCD \cdot 0.9C_2H_5CN \cdot 3.8H_2O$  prepared from tetrahydrate **A**

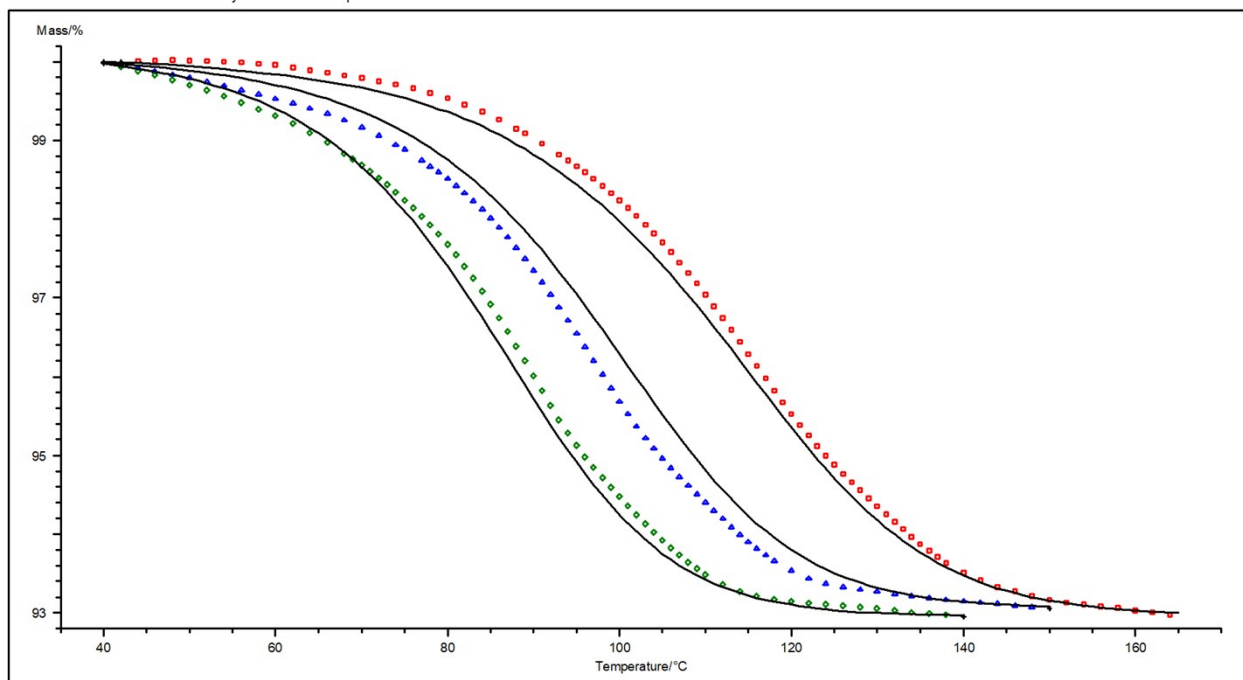

Figure S49. Approximation of TG curves (1st step for  $aCD \cdot 1.0C_2H_5CN \cdot 4.1H_2O$  prepared from tetrahydrate **B**) with model method (CnB).

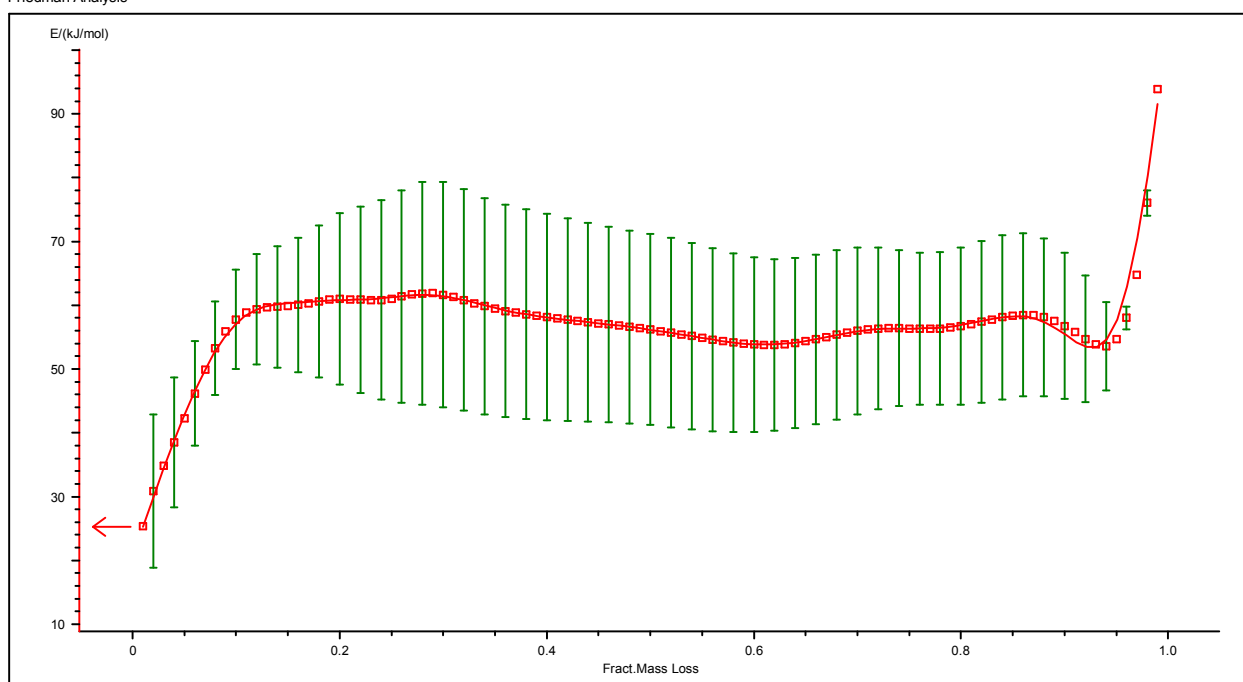

Figure S50. Friedman analysis for the 1 step of decomposition of  $aCD \cdot 1.0C_2H_5CN \cdot 4.1H_2O$  prepared from tetrahydrate **B**.



Ozawa-Flynn-Wall Analysis

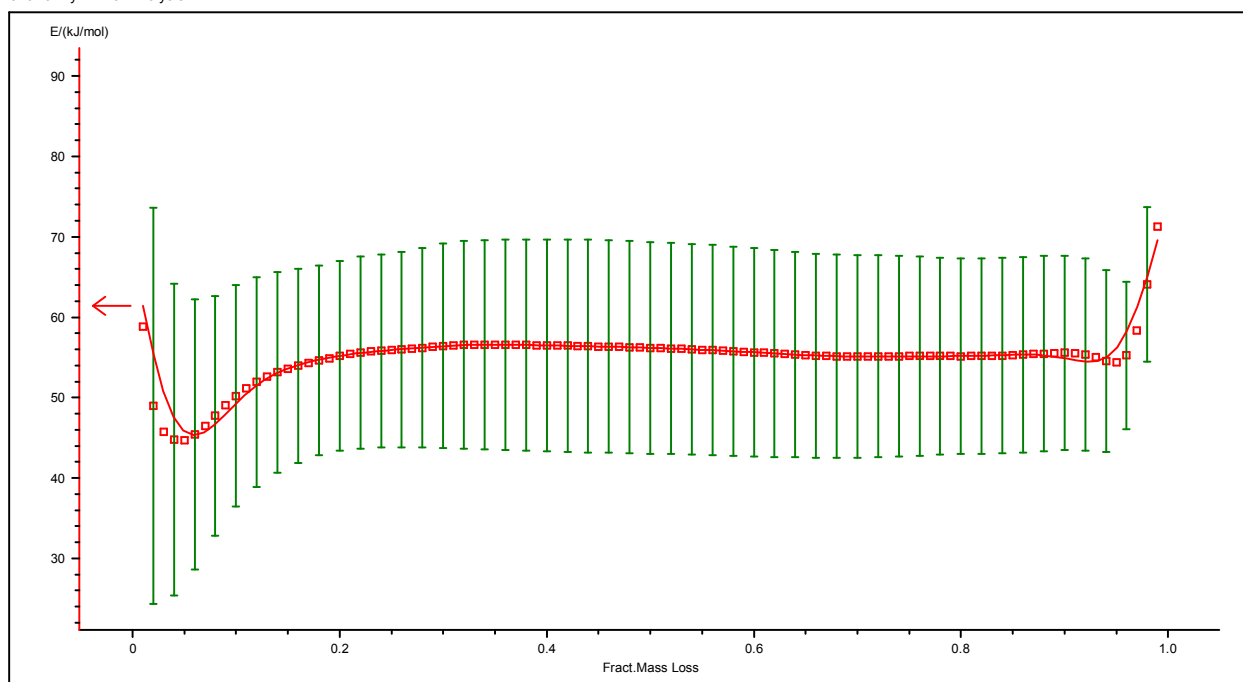

Figure S51. Ozawa-Flynn-Wall analysis for the 1 step of decomposition of  $aCD \cdot 1.0C_2H_5CN \cdot 4.1H_2O$  prepared from tetrahydrate **B**.

NETZSCH Thermokinetics TetrahydrateB-EiCN-2step

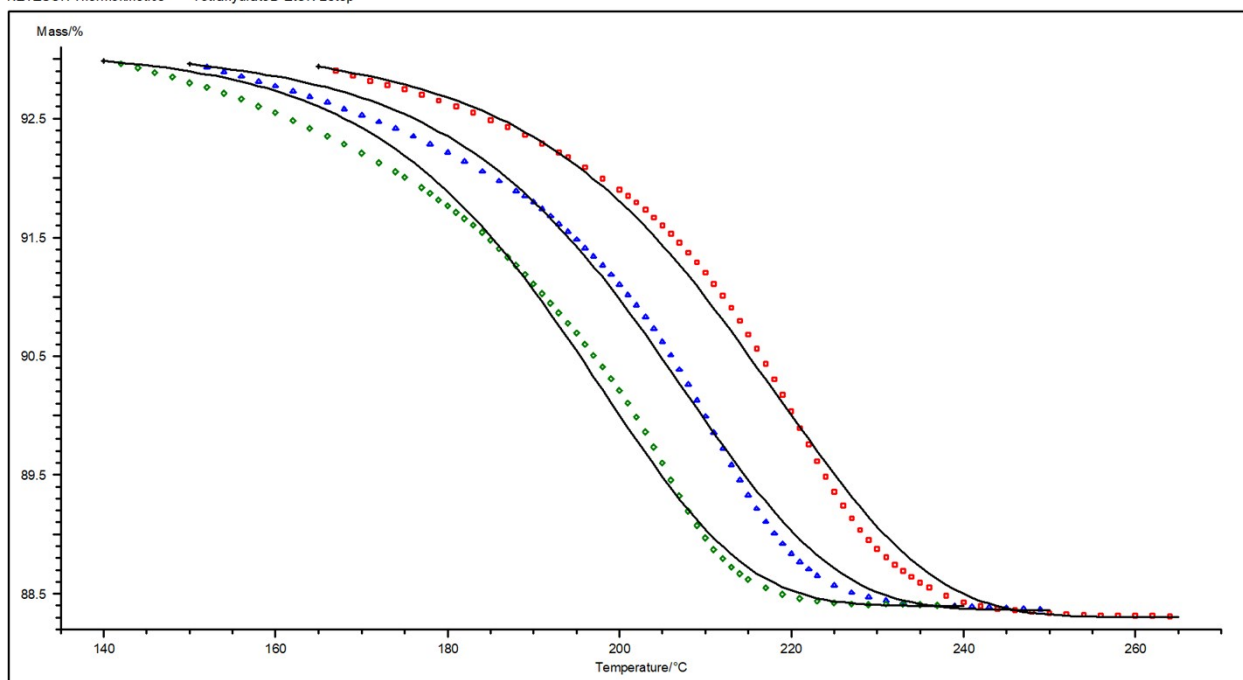

Figure S52. Approximation of TG curves (2nd step for  $aCD \cdot 1.0C_2H_5CN \cdot 4.1H_2O$  prepared from tetrahydrate **B**) with model method (An).

Friedman Analysis

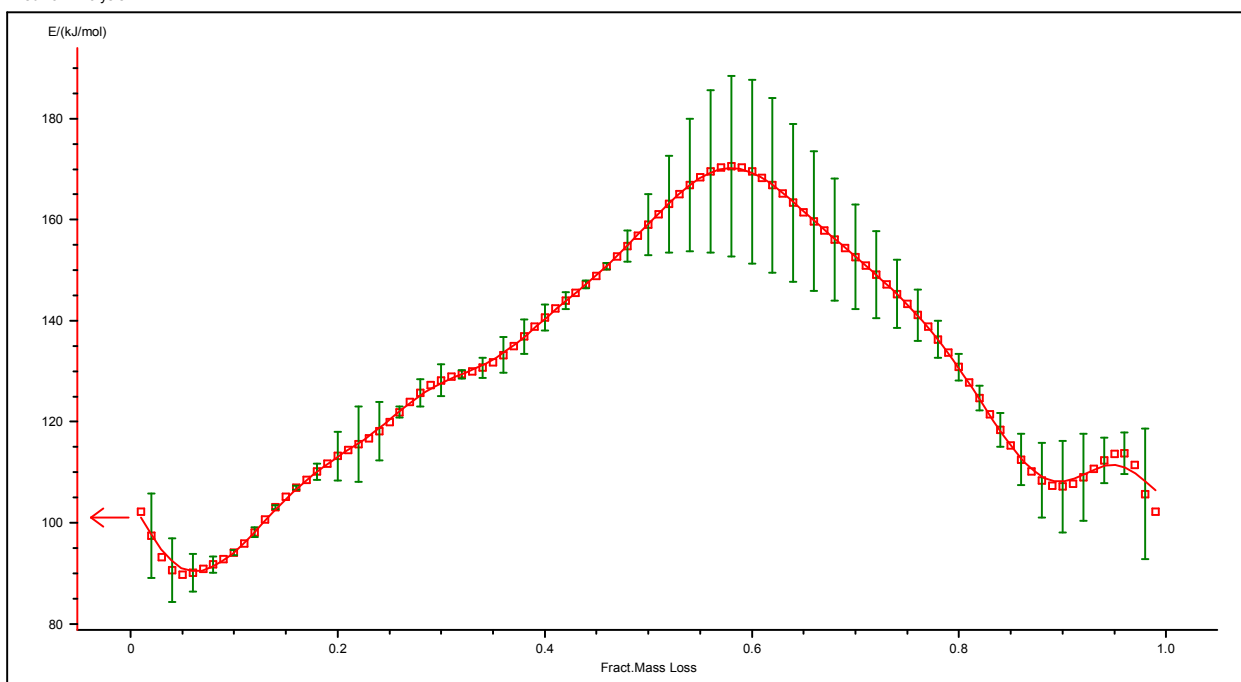

Figure S53. Friedman analysis for the 2nd step of decomposition of  $a\text{CD}\cdot 1.0\text{C}_2\text{H}_5\text{CN}\cdot 4.1\text{H}_2\text{O}$  prepared from tetrahydrate **B**.

Ozawa-Flynn-Wall Analysis

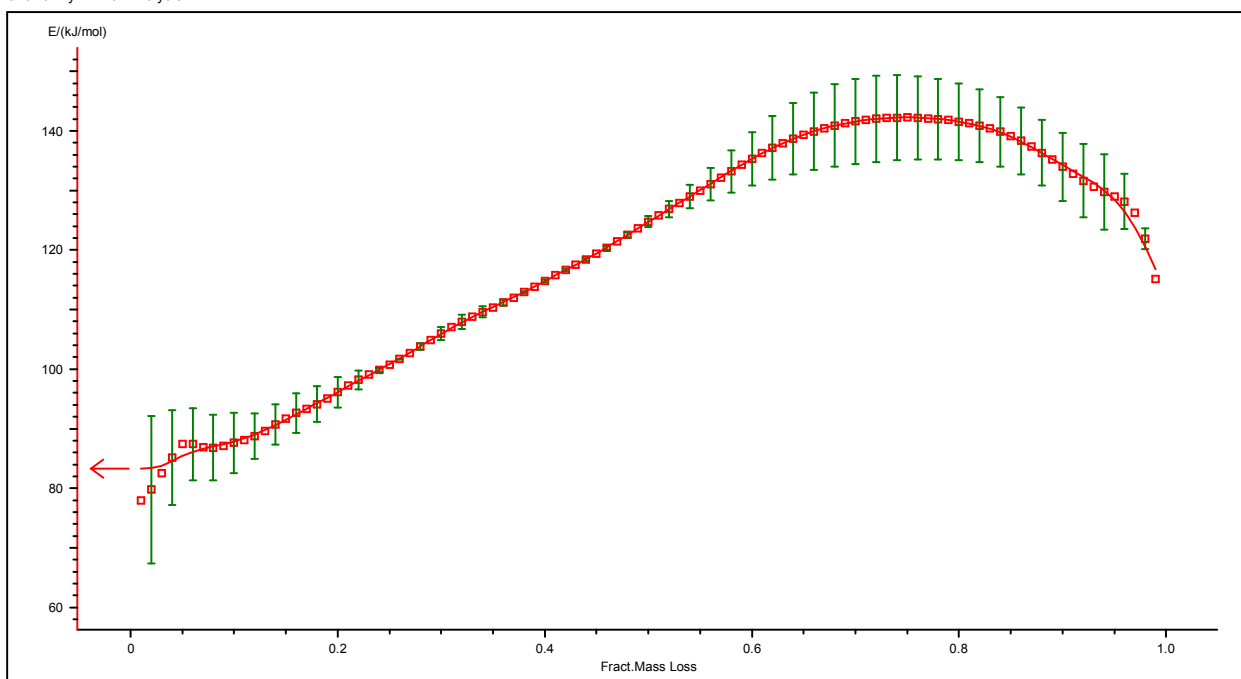

Figure S54. Ozawa-Flynn-Wall analysis for the 2nd step of decomposition of  $a\text{CD}\cdot 1.0\text{C}_2\text{H}_5\text{CN}\cdot 4.1\text{H}_2\text{O}$  prepared from tetrahydrate **B**.

## References

1. A. K. Gatiatulin, V. Y. Osel'skaya, M. A. Ziganshin and V. V. Gorbachuk, Size exclusion effect in binary inclusion compounds of  $\alpha$ -cyclodextrin, *Phys. Chem. Chem. Phys.*, 2018, 20, 26105–26116. **DOI: 10.1039/c8cp03104e**
2. K. K. Chacko and W. Saenger, Topography of cyclodextrin inclusion complexes. 15. Crystal and molecular structure of the cyclohexaamylose-7.57 water complex, form III. Four- and six-membered circular hydrogen bonds, *J. Am. Chem. Soc.*, 1981, 103, 1708–1715. **DOI: 10.1021/ja00397a021**
3. K. Lindner and W. Saenger, Topography of cyclodextrin inclusion complexes. XVI. Cyclic system of hydrogen bonds: structure of  $\alpha$ -cyclodextrin hexahydrate, form (II): comparison with form (I), *Acta Crystallogr. Sect. B Struct. Crystallogr. Cryst. Chem.*, 1982, 38, 203–210. **DOI: 10.1107/S0567740882002386**
